# Supplementary material
Source: publisher figshare collection journal article supplement (https://gsapubs.figshare.com/ndownloader/files/23305577)
Supplement: Supplementary file 1 [file 23305577]

## Sheet: TABLE A1
TABLE DR1. U, Pb AND Th ISOTOPIC DATA OBTAINED USING THE LA-ICP-MS METHOD
I.D.	Isotopic Ratios								Isotopic Ages								Parts per million (ppm)			Best Age		Best Age threshold
	207Pb/235U	±2σ	206Pb/238U	±2σ	Pb207/Pb206	±2σ	208Pb/232U	±2σ	235U/207Pb	±2σ	238U/206Pb	±2σ	232U/208Pb	±2σ	Pb207/Pb206	±2σ	238U	232Th	Th/U	(Ma)	±2σ	(Spencer et al. 2015)
AP-045
AP_45_1	1.68	0.17	0.1647	0.0061	0.0746	0.0077	0.032	0.032	980	65	982	34	530	610	930	210	5.25	0.176	0.0335238	982	34	1500
AP_45_2	1.646	0.056	0.1686	0.0036	0.071	0.0027	0.051	0.0063	986	22	1004	20	1000	120	937	77	20.5	6.77	0.330244	1004	20
AP_45_3	2.08	0.052	0.183	0.0034	0.0825	0.0019	0.058	0.0041	1141	17	1083	18	1140	78	1250	45	126	54	0.428571	1083	18
AP_45_4	2.024	0.054	0.1912	0.0032	0.0767	0.0015	0.0582	0.0041	1122	18	1128	17	1143	78	1109	40	107.4	116.8	1.08752	1128	17
AP_45_5	1.64	0.058	0.1697	0.0036	0.0702	0.0026	0.0543	0.0073	983	22	1010	20	1060	140	915	77	38.6	4.4	0.11399	1010	20
AP_45_6	1.64	0.12	0.1656	0.0058	0.0743	0.0067	0.054	0.0069	996	54	987	32	1060	130	990	180	15.4	5.97	0.387662	987	32
AP_45_7	1.645	0.047	0.1654	0.003	0.072	0.0017	0.0492	0.0037	986	18	986	17	970	72	980	48	112.9	69	0.61116	986	17
AP_45_8	1.661	0.054	0.1668	0.0028	0.0722	0.0023	0.0516	0.004	992	21	994	16	1017	77	977	69	57.8	29	0.50173	994	16
AP_45_9	1.67	0.13	0.1683	0.0051	0.0721	0.0054	0.0429	0.01	985	50	1002	28	840	190	920	160	10.7	1.16	0.108411	1002	28
AP_45_10	1.72	0.15	0.161	0.0053	0.0777	0.0068	0.061	0.02	1004	56	962	29	1160	370	1060	180	7.57	0.932	0.123118	962	29
AP_45_11	1.52	0.12	0.1615	0.0048	0.0685	0.0052	0.0515	0.0094	928	48	965	27	1010	180	800	160	9.02	1.596	0.17694	965	27
AP_45_12	1.853	0.058	0.176	0.0029	0.0765	0.0025	0.0556	0.004	1062	21	1045	16	1094	77	1094	62	51.3	63.8	1.24366	1045	16
AP_45_13	1.656	0.039	0.1636	0.003	0.0734	0.0015	0.0518	0.0041	991	15	976	17	1020	78	1030	38	117.7	34.2	0.290569	976	17
AP_45_14	1.637	0.06	0.1654	0.003	0.0717	0.0024	0.0496	0.0041	982	23	987	17	977	79	964	66	44.7	31.9	0.713647	987	17
AP_45_15	1.67	0.075	0.1653	0.0031	0.0734	0.0034	0.0541	0.0055	993	28	986	17	1064	100	996	92	30.1	15.46	0.513621	986	17
AP_45_16	1.806	0.074	0.1781	0.0044	0.0736	0.0026	0.0534	0.0043	1044	26	1056	24	1051	83	1013	73	40	38.2	0.955	1056	24
AP_45_17	1.8	0.21	0.1706	0.0071	0.0766	0.0088	0.051	0.011	1023	79	1014	39	1010	210	1000	250	4.79	2.32	0.484342	1014	39
AP_45_18	1.91	0.062	0.1812	0.0037	0.0765	0.0023	0.0546	0.0041	1082	22	1073	20	1075	79	1096	59	42.7	38.1	0.892272	1073	20
AP_45_19	1.76	0.11	0.1718	0.0047	0.0745	0.0047	0.0558	0.0093	1021	40	1021	26	1090	180	1000	130	11.6	3.35	0.288793	1021	26
AP_45_20	1.643	0.036	0.1661	0.0027	0.0717	0.0014	0.0493	0.0037	986	14	991	15	973	72	972	41	149.2	67.1	0.449732	991	15
AP_45_21	2.029	0.035	0.1865	0.0028	0.07887	0.001	0.0569	0.004	1125	12	1102	15	1118	77	1167	26	297	121	0.407407	1102	15
AP_45_22	2.063	0.043	0.1916	0.0029	0.0777	0.0011	0.0659	0.0053	1136	14	1130	17	1289	100	1137	28	1130	39.1	0.0346018	1130	17
AP_45_23	1.691	0.07	0.1673	0.0033	0.0734	0.003	0.0511	0.0057	1002	26	997	18	1004	120	1001	84	35.9	7.24	0.201671	997	18
AP_45_24	0.264	0.037	0.0395	0.0021	0.0486	0.0067	0.0166	0.007	236	30	250	13	330	140	130	270	30.5	5.77	0.18918	250	13
AP_45_25	1.679	0.076	0.1707	0.0038	0.0716	0.0035	0.0542	0.0093	996	29	1015	21	1060	180	940	100	25.2	1.891	0.0750397	1015	21
AP_45_26	1.681	0.06	0.1676	0.0027	0.0729	0.0029	0.0507	0.0049	999	23	999	15	998	94	989	80	58.3	11.7	0.200686	999	15
AP_45_27	1.68	0.05	0.166	0.0028	0.0734	0.002	0.0523	0.0046	999	19	990	16	1030	89	1014	57	94.3	17.6	0.186638	990	16
AP_45_28	1.51	0.1	0.1493	0.0036	0.0735	0.0046	0.0436	0.0066	929	40	897	20	860	130	990	130	28.97	4.7	0.162237	897	20
AP_45_29	0.282	0.024	0.03968	0.00074	0.0516	0.0042	0.013	0.002	251	19	250.8	4.6	261	40	240	160	61.8	12.07	0.195307	250.8	4.6
AP_45_30	1.684	0.039	0.1695	0.0029	0.072	0.0013	0.0518	0.0037	1002	15	1009	16	1021	72	982	37	156.3	90.1	0.576456	1009	16
AP_45_31	2.325	0.083	0.2124	0.0052	0.0792	0.0021	0.0628	0.0063	1217	25	1241	28	1229	120	1170	53	49.5	24	0.484848	1241	28
AP_45_32	1.783	0.047	0.1724	0.0033	0.075	0.0017	0.0519	0.0042	1042	16	1025	18	1022	81	1062	46	61.2	29.9	0.488562	1025	18
AP_45_33	1.689	0.069	0.1669	0.0031	0.0736	0.0032	0.0489	0.0048	1001	26	995	17	964	93	1004	87	34.6	16.51	0.477168	995	17
AP_45_34	1.653	0.047	0.1661	0.0027	0.0721	0.0016	0.0518	0.0072	989	18	990	15	1020	140	982	45	114.4	5.19	0.0453671	990	15
AP_45_35	1.714	0.04	0.1711	0.0027	0.0723	0.0014	0.054	0.0057	1013	15	1018	15	1062	110	997	45	238	11.1	0.0466387	1018	15
AP_45_36	1.54	0.12	0.1655	0.0059	0.0682	0.0057	0.079	0.029	934	52	986	33	1480	580	780	190	5.81	0.325	0.055938	986	33
AP_45_37	1.623	0.072	0.1693	0.0032	0.0695	0.003	0.0489	0.0048	976	27	1008	17	964	92	890	87	28.8	10.6	0.368056	1008	17
AP_45_38	1.626	0.083	0.1632	0.0036	0.0722	0.0035	0.0481	0.0055	975	32	974	20	947	110	961	98	23.57	8.98	0.380993	974	20
AP_45_39	2.123	0.088	0.1897	0.0043	0.0809	0.0023	0.058	0.0048	1153	28	1119	23	1139	91	1213	56	126	41.8	0.331746	1119	23
AP_45_40	1.619	0.045	0.1647	0.0024	0.0713	0.002	0.0493	0.0038	976	18	983	13	973	74	955	57	76.8	44.9	0.584635	983	13
AP_45_41	1.607	0.066	0.1645	0.0035	0.071	0.0029	0.0529	0.0067	969	26	981	19	1040	130	932	87	28.7	3.47	0.120906	981	19
AP_45_42	1.808	0.058	0.1694	0.0031	0.0774	0.0023	0.0518	0.0083	1046	21	1008	17	1010	160	1120	59	54.1	4.08	0.0754159	1008	17
AP_45_43	2.09	0.059	0.1884	0.0031	0.0805	0.0016	0.0572	0.0046	1144	19	1112	17	1124	87	1205	41	120.3	49.8	0.413965	1112	17
AP_45_44	1.567	0.075	0.1619	0.0036	0.071	0.0033	0.0419	0.0079	960	33	967	20	830	150	954	87	18.7	2.05	0.109626	967	20
AP_45_45	1.702	0.089	0.1656	0.0034	0.0746	0.0037	0.054	0.012	1004	33	987	19	1060	220	1020	100	12.33	1.285	0.104217	987	19
AP_45_46	1.629	0.063	0.1613	0.0031	0.0731	0.0026	0.0495	0.004	979	25	964	17	976	76	1004	76	80.3	42.7	0.531756	964	17
AP_45_47	1.614	0.044	0.1623	0.0039	0.0725	0.0026	0.0467	0.0043	975	17	969	22	923	83	994	74	113	36.8	0.325664	969	22
AP_45_48	1.586	0.051	0.1623	0.0031	0.0709	0.002	0.0474	0.0062	963	20	969	17	930	120	947	58	54.7	6.77	0.123766	969	17
AP_45_49	2.091	0.048	0.1924	0.0032	0.0789	0.0018	0.0565	0.0043	1145	16	1134	18	1111	82	1162	46	115.1	48.5	0.421373	1134	18
AP_45_50	2.076	0.04	0.193	0.0025	0.0779	0.0013	0.0561	0.004	1140	13	1137	13	1103	76	1142	33	317.6	248	0.780856	1137	13
AP_45_51	2.109	0.054	0.1956	0.0033	0.0782	0.0018	0.057	0.0042	1150	18	1152	18	1120	81	1144	48	87.5	54.9	0.627429	1152	18
AP_45_52	1.635	0.05	0.167	0.0028	0.071	0.0021	0.0483	0.0037	982	19	996	16	953	72	945	61	67.5	31	0.459259	996	16
AP_45_53	1.706	0.07	0.1693	0.0034	0.073	0.0026	0.0527	0.0056	1007	26	1008	19	1036	110	996	73	41.5	12.22	0.294458	1008	19
AP_45_54	1.61	0.064	0.165	0.0041	0.0716	0.0029	0.0513	0.0071	971	27	984	23	1040	140	953	79	26	2.19	0.0842308	984	23
AP_45_55	0.275	0.027	0.03893	0.0009	0.0517	0.0053	0.0111	0.0013	244	21	246.1	5.6	222	26	200	190	33.9	25.7	0.758112	246.1	5.6
AP_45_56	0.297	0.021	0.04	0.0011	0.0541	0.004	0.012	0.0017	263	16	253.1	6.6	240	33	320	150	48.9	13.99	0.286094	253.1	6.6
AP_45_57	1.65	0.11	0.1659	0.0047	0.0723	0.0043	0.057	0.016	982	40	989	26	1090	300	940	120	10.94	0.643	0.0587751	989	26
AP_45_58	0.282	0.014	0.03995	0.00098	0.0513	0.0027	0.0118	0.0015	251	11	252.5	6.1	237	29	240	110	75.6	22.1	0.292328	252.5	6.1
AP_45_59	0.28	0.019	0.03943	0.00096	0.0517	0.0036	0.012	0.0012	250	15	249.3	6	241	24	240	140	38.7	32.8	0.847545	249.3	6
AP_45_60	2.159	0.065	0.1957	0.0043	0.0798	0.0018	0.0589	0.0051	1167	21	1152	23	1156	98	1190	45	134.2	48.3	0.359911	1152	23
AP_45_61	1.565	0.073	0.16	0.0046	0.0709	0.0027	0.0515	0.0053	952	29	956	26	1013	100	934	82	33.7	7.53	0.223442	956	26
AP_45_62	1.608	0.073	0.1651	0.0038	0.0707	0.0027	0.054	0.011	972	28	985	21	1060	210	943	74	53	4.43	0.0835849	985	21
AP_45_63	1.656	0.069	0.1656	0.003	0.0725	0.0028	0.0528	0.01	989	26	988	17	1030	200	984	79	44.2	2.57	0.0581448	988	17
AP_45_64	2.048	0.055	0.1939	0.0038	0.0766	0.0017	0.0558	0.0047	1131	18	1142	20	1097	90	1108	43	153	56.5	0.369281	1142	20
AP_45_65	1.643	0.048	0.1657	0.0026	0.0717	0.0022	0.0505	0.0042	985	18	988	15	995	80	965	61	62.3	20.78	0.333547	988	15
AP_45_66	1.659	0.056	0.1697	0.0035	0.0711	0.0027	0.0518	0.0055	991	22	1010	19	1020	100	940	78	37.26	8.87	0.238057	1010	19
AP_45_67	1.647	0.059	0.1628	0.0025	0.0734	0.0026	0.0483	0.0059	986	22	972	14	952	110	1008	71	42.7	8.67	0.203044	972	14
AP_45_68	1.604	0.08	0.1676	0.0034	0.0687	0.0031	0.0561	0.0056	967	31	999	19	1102	110	880	100	17.1	8.28	0.484211	999	19
AP_45_69	1.613	0.041	0.1602	0.0029	0.0736	0.0021	0.0433	0.0056	974	16	958	16	855	110	1019	56	51.8	5.02	0.0969112	958	16
AP_45_70	1.66	0.16	0.1624	0.0065	0.0751	0.0079	0.0559	0.0065	973	63	969	36	1097	120	930	220	4.76	5.35	1.12395	969	36
AP_45_71	1.568	0.041	0.162	0.003	0.0703	0.0021	0.0485	0.0044	956	17	968	17	956	85	926	61	52.1	16.05	0.308061	968	17
AP_45_72	1.622	0.078	0.1672	0.0034	0.0703	0.0032	0.0498	0.0082	974	31	997	19	980	160	908	96	24.3	2.64	0.108642	997	19
AP_45_73	1.904	0.059	0.1809	0.0031	0.0763	0.0018	0.0563	0.0049	1081	21	1072	17	1105	94	1095	47	157.4	13.09	0.0831639	1072	17
AP_45_74	1.699	0.065	0.1674	0.0039	0.0737	0.0029	0.0487	0.008	1005	24	998	22	960	150	1015	77	24.42	2.56	0.104832	998	22
AP_45_75	1.625	0.026	0.1643	0.002	0.07172	0.00099	0.0487	0.0036	979.7	10	980.3	11	961	69	976	29	510	74.3	0.145686	980.3	11
AP_45_76	1.752	0.047	0.1717	0.0034	0.0739	0.0013	0.0499	0.0036	1026	17	1021	19	984	69	1036	35	289	108	0.373702	1021	19
AP_45_77	1.704	0.07	0.1691	0.0032	0.0731	0.0029	0.0518	0.0042	1007	26	1007	18	1020	80	996	80	29.85	44.3	1.48409	1007	18
AP_45_78	1.961	0.039	0.1841	0.0028	0.0772	0.0013	0.0552	0.0043	1101	13	1089	15	1085	83	1131	31	220.7	54.1	0.245129	1089	15
AP_45_79	1.769	0.06	0.1713	0.0045	0.0749	0.0017	0.0483	0.004	1032	22	1019	25	952	76	1058	47	126	33.3	0.264286	1019	25
AP_45_80	1.709	0.078	0.1685	0.0034	0.0734	0.0028	0.0527	0.0064	1007	30	1004	19	1030	120	1003	81	37.9	5.93	0.156464	1004	19
AP_45_81	1.71	0.11	0.1626	0.0036	0.0755	0.0046	0.0542	0.0099	1002	42	971	20	1060	190	1030	130	10.68	2.31	0.216292	971	20
AP_45_82	1.601	0.056	0.163	0.0028	0.0712	0.0023	0.0507	0.004	968	22	973	15	1000	77	950	65	57.8	41.5	0.717993	973	15
AP_45_83	1.751	0.073	0.1696	0.0034	0.0752	0.0033	0.0495	0.0066	1031	29	1010	19	970	130	1049	90	28.4	3.53	0.124296	1010	19
AP_45_84	1.824	0.062	0.174	0.0035	0.0757	0.0023	0.0538	0.0048	1052	22	1034	19	1058	92	1076	62	98	19.6	0.2	1034	19
AP_45_85	1.915	0.034	0.1832	0.0028	0.07577	0.00094	0.0499	0.0043	1086	12	1084	15	984	83	1088	25	1311	41.8	0.0318841	1084	15
AP_45_86	1.21	0.031	0.1163	0.002	0.0755	0.0017	0.0475	0.0036	805	14	709	12	937	69	1075	46	202	85.7	0.424257	709	12
AP_45_87	1.966	0.049	0.1867	0.0042	0.0776	0.0015	0.0609	0.0056	1103	17	1103	23	1193	110	1140	34	192	50.4	0.2625	1103	23
AP_45_88	1.921	0.084	0.1848	0.0047	0.0753	0.0023	0.0547	0.004	1085	30	1093	26	1076	76	1067	62	87.8	73.4	0.835991	1093	26
AP_45_89	0.235	0.019	0.03007	0.00074	0.0565	0.0042	0.00879	0.00082	213	16	191	4.7	177	16	420	160	60.1	63.2	1.05158	191	4.7
AP_45_90	0.2078	0.0049	0.0301	0.00051	0.0501	0.0011	0.0096	0.00069	191.6	4.1	191.2	3.2	193	14	197	51	1050	760	0.72381	191.2	3.2
AP_45_91	0.271	0.031	0.0421	0.0013	0.0476	0.0053	0.0121	0.002	247	27	265.8	8	242	40	70	200	35.5	14.47	0.407606	265.8	8
AP_45_92	2.138	0.072	0.2003	0.0052	0.0774	0.0021	0.0559	0.0041	1160	23	1177	28	1100	79	1127	52	126.9	101.2	0.797478	1177	28
AP_45_93	1.664	0.036	0.1663	0.0028	0.0726	0.0013	0.0512	0.0037	994	14	992	16	1010	71	998	36	216.8	197.7	0.9119	992	16
AP_45_94	1.662	0.082	0.1657	0.0041	0.0728	0.0034	0.0499	0.0048	990	31	988	23	984	92	985	96	33.5	26.1	0.779104	988	23
AP_45_95	1.66	0.042	0.1679	0.0027	0.0713	0.0013	0.0515	0.0038	992	16	1000	15	1015	74	971	42	144.3	65.8	0.455994	1000	15
AP_45_96	1.669	0.044	0.1671	0.0035	0.0725	0.0021	0.0499	0.0039	995	17	996	19	984	76	991	57	78.7	36.1	0.458704	996	19
AP_45_97	1.654	0.054	0.1661	0.0031	0.0722	0.0021	0.0499	0.0042	989	21	990	17	983	81	994	56	56.9	27.99	0.491916	990	17
AP_45_98	1.676	0.035	0.1674	0.0026	0.0726	0.0012	0.0495	0.0044	999	13	998	14	975	85	999	35	248.6	32.27	0.129807	998	14
AP_45_99	1.838	0.056	0.1805	0.004	0.0739	0.0019	0.0573	0.0075	1057	20	1069	22	1120	140	1030	52	102	9.3	0.0911765	1069	22
AP_45_100	1.635	0.037	0.1631	0.0031	0.0727	0.0013	0.0489	0.004	983	14	974	17	965	77	1001	38	310	44.1	0.142258	974	17
AP_45_101	0.194	0.019	0.02978	0.00095	0.0463	0.0041	0.0087	0.0014	179	16	189.2	5.9	175	29	70	170	53.2	19.4	0.364662	189.2	5.9
AP_45_102	0.273	0.012	0.03865	0.00077	0.0513	0.0022	0.0117	0.0021	244.8	9.6	244.4	4.8	234	42	246	93	136.5	12.7	0.0930403	244.4	4.8
AP_45_103	0.306	0.027	0.04093	0.00092	0.0544	0.0048	0.0206	0.0047	269	21	258.6	5.7	410	93	330	180	53.8	4.91	0.0912639	258.6	5.7
AP_45_104	1.631	0.042	0.1626	0.0026	0.0724	0.0015	0.0486	0.0036	981	16	971	14	959	70	991	42	131.4	91.2	0.694064	971	14
AP_45_105	1.679	0.032	0.1626	0.0026	0.0749	0.0013	0.0516	0.0038	1000	12	971	14	1017	73	1064	35	382	91.1	0.238482	971	14
AP_45_106	1.568	0.067	0.165	0.0041	0.069	0.0029	0.0528	0.0094	955	26	984	23	1030	180	878	91	36.8	4.92	0.133696	984	23
AP_45_107	0.266	0.029	0.0401	0.0011	0.0483	0.0053	0.01167	0.0013	237	23	253.3	6.6	234	25	90	200	41.5	32.4	0.780723	253.3	6.6
AP_45_108	0.29	0.028	0.0401	0.001	0.0526	0.005	0.0112	0.0014	256	21	253.6	6.5	225	28	290	190	35.8	19	0.530726	253.6	6.5
AP_45_109	1.771	0.052	0.1734	0.0039	0.0736	0.0016	0.0494	0.0046	1033	19	1031	21	975	88	1036	49	127	25	0.19685	1031	21
AP_45_110	1.647	0.066	0.1633	0.0031	0.0732	0.0029	0.0456	0.0054	992	23	975	17	899	100	1019	75	50.7	8.18	0.161341	975	17
AP_45_111	1.7	0.073	0.1647	0.0033	0.075	0.0037	0.049	0.012	1004	29	982	18	950	220	1039	95	21	1.6	0.0761905	982	18
AP_45_112	1.69	0.092	0.1649	0.0038	0.0746	0.0044	0.0503	0.0097	999	34	984	21	990	180	1010	110	17.23	3.46	0.200813	984	21
AP_45_113	1.592	0.066	0.1612	0.0029	0.0709	0.0032	0.049	0.0035	964	26	963	16	966	67	925	98	36.2	181	5	963	16
AP_45_114	0.313	0.025	0.04083	0.00089	0.0556	0.0043	0.0119	0.0015	275	20	257.9	5.5	239	31	380	160	58.5	21.8	0.37265	257.9	5.5
AP_45_115	1.749	0.046	0.1747	0.0035	0.0726	0.0015	0.0517	0.0041	1026	17	1038	19	1019	79	997	42	114	46	0.403509	1038	19
AP_45_116	1.621	0.028	0.1609	0.0025	0.07334	0.00099	0.0509	0.0041	980	12	961	14	1003	79	1021	27	516	36.2	0.070155	961	14
AP_45_117	2.166	0.057	0.196	0.0034	0.0798	0.0017	0.059	0.0063	1169	18	1154	18	1157	120	1186	43	115.7	13.62	0.117718	1154	18
AP_45_118	1.578	0.035	0.1616	0.0029	0.0712	0.0014	0.047	0.004	961	14	966	16	928	77	959	41	121.2	38.6	0.318482	966	16
AP_45_119	1.872	0.045	0.18	0.003	0.0754	0.0015	0.0532	0.0049	1070	16	1067	16	1046	94	1075	38	162.8	17.02	0.104545	1067	16
AP_45_120	1.6	0.17	0.1669	0.006	0.0706	0.0084	0.035	0.06	964	62	994	33	400	1000	860	220	6.54	0.181	0.0276758	994	33
AP_45_121	1.631	0.04	0.1647	0.0031	0.0718	0.0016	0.0505	0.0039	981	15	982	17	996	75	975	46	108.7	46.5	0.427783	982	17
AP_45_122	1.66	0.05	0.1662	0.0033	0.0724	0.0019	0.0481	0.0043	992	19	991	18	949	82	989	55	84.7	25.84	0.305077	991	18
AP_45_123	1.97	0.15	0.1857	0.0091	0.0764	0.0036	0.0625	0.0091	1092	49	1096	49	1220	170	1078	90	38	8.6	0.226316	1096	49
AP_45_124	1.69	0.057	0.17	0.0031	0.0721	0.0021	0.0497	0.0037	1003	22	1012	17	980	71	990	57	100.5	106.6	1.0607	1012	17
AP_45_125	1.742	0.057	0.1716	0.0033	0.0737	0.0023	0.0519	0.0043	1022	21	1020	18	1021	83	1020	61	58.9	35.1	0.595925	1020	18
AP_45_126	1.71	0.13	0.1662	0.004	0.0755	0.0058	0.044	0.013	1000	49	991	22	860	240	1000	160	9.05	0.875	0.0966851	991	22
AP_45_127	1.63	0.11	0.1614	0.0045	0.0734	0.005	0.035	0.012	972	45	964	25	680	240	990	140	12.58	1.085	0.086248	964	25
AP_45_128	2.4	0.19	0.2236	0.0067	0.0762	0.005	0.063	0.021	1229	55	1300	35	1190	400	1080	140	10.1	0.883	0.0874257	1300	35
AP_45_129	1.666	0.059	0.1632	0.0032	0.0741	0.0026	0.0508	0.0053	993	23	974	17	1001	100	1028	70	47.6	13.37	0.280882	974	17
AP_45_130	2.525	0.08	0.2171	0.0037	0.0843	0.0024	0.0654	0.0058	1277	23	1266	20	1278	110	1291	54	46.3	18.29	0.395032	1266	20
AP_45_131	1.667	0.081	0.1651	0.0031	0.0732	0.0034	0.052	0.0066	991	30	985	17	1020	130	991	92	21.62	9.83	0.454672	985	17
AP_45_132	1.538	0.063	0.1567	0.0034	0.0714	0.0031	0.0486	0.0039	943	25	938	19	958	75	943	88	46.9	33.8	0.720682	938	19
AP_45_133	1.656	0.079	0.1654	0.0044	0.0729	0.0038	0.061	0.014	987	30	986	24	1180	260	970	110	28	1.66	0.0592857	986	24
AP_45_134	0.28	0.019	0.03857	0.0008	0.0525	0.0034	0.0121	0.0014	249	15	243.9	4.9	242	27	280	130	110.8	44.87	0.404964	243.9	4.9
AP_45_135	1.629	0.076	0.165	0.0037	0.0716	0.0031	0.055	0.011	977	30	984	20	1080	210	947	94	31.2	2.09	0.0669872	984	20
AP_45_136	1.687	0.039	0.1679	0.003	0.0729	0.0015	0.051	0.0039	1003	15	1000	16	1004	74	1006	42	319	172	0.539185	1000	16
AP_45_137	2.108	0.037	0.1958	0.0034	0.07811	0.0011	0.0592	0.0053	1151	12	1152	18	1161	100	1148	27	1666	16.66	0.01	1152	18
AP_45_138	1.62	0.056	0.1631	0.0028	0.0721	0.0024	0.05	0.0043	976	21	974	15	985	83	973	68	70.5	29.48	0.418156	974	15
AP_45_139	1.58	0.11	0.1625	0.0047	0.0707	0.0049	0.056	0.028	952	45	970	26	1020	520	880	160	10.7	0.409	0.0382243	970	26
AP_45_140	1.644	0.067	0.1668	0.0036	0.0717	0.0034	0.0505	0.0043	984	26	994	20	996	83	949	95	42	30.4	0.72381	994	20
AP_45_141	1.679	0.064	0.1644	0.0036	0.0742	0.0028	0.0475	0.0049	998	25	981	20	936	94	1026	80	56.6	11.91	0.210424	981	20
AP_45_142	1.656	0.093	0.1648	0.004	0.0729	0.0037	0.0494	0.0067	986	35	983	22	970	130	970	110	25.7	6.61	0.257198	983	22
AP_45_143	1.661	0.091	0.169	0.0046	0.0715	0.0039	0.0487	0.0048	988	35	1006	25	960	92	930	110	22.1	12.42	0.561991	1006	25
AP_45_144	1.643	0.03	0.1643	0.0026	0.07249	0.0011	0.0499	0.0036	986	12	981	14	984	70	997	30	398	194.4	0.488442	981	14
AP_45_145	1.635	0.05	0.1635	0.0027	0.0725	0.0021	0.0447	0.0047	982	20	976	15	883	91	989	59	65.4	17.53	0.268043	976	15
AP_45_146	1.858	0.082	0.1803	0.0038	0.0746	0.0025	0.0548	0.0058	1062	29	1068	21	1076	110	1041	71	56.5	13.38	0.236814	1068	21
AP_45_147	1.652	0.038	0.1659	0.0033	0.0723	0.0016	0.0496	0.0044	990	14	989	18	978	85	989	47	116	46.6	0.401724	989	18
AP_45_148	1.87	0.15	0.1891	0.007	0.0718	0.0055	0.0694	0.011	1057	53	1115	38	1350	210	910	160	9.44	2.55	0.270127	1115	38
AP_45_149	1.93	0.13	0.1825	0.0045	0.0781	0.005	0.0553	0.0064	1093	46	1080	25	1086	120	1090	130	16.42	8.46	0.515225	1080	25
AP_45_150	0.296	0.02	0.0393	0.0011	0.0547	0.0035	0.0124	0.0017	266	17	248.3	6.6	249	35	400	150	57.8	16.68	0.288581	248.3	6.6
AP_45_151	0.286	0.02	0.04047	0.00084	0.0521	0.0038	0.0124	0.0014	258	17	255.8	5.2	250	27	250	140	75.6	32	0.42328	255.8	5.2
AP_45_152	1.678	0.091	0.1665	0.0052	0.073	0.0031	0.0455	0.0056	994	35	992	29	898	110	988	87	12.73	9.28	0.728987	992	29
AP_45_153	1.984	0.045	0.1854	0.0033	0.0778	0.0013	0.0552	0.004	1110	15	1096	18	1087	77	1139	34	602	336.7	0.559302	1096	18
AP_45_154	2.105	0.049	0.1952	0.004	0.0783	0.0019	0.0568	0.0045	1150	16	1149	22	1116	87	1150	48	181.8	40.3	0.221672	1149	22
AP_45_155	1.738	0.051	0.1695	0.0026	0.0744	0.0021	0.0496	0.0041	1022	19	1009	14	979	79	1045	57	141.8	50.2	0.35402	1009	14
AP_45_156	2.163	0.063	0.1998	0.0029	0.0784	0.0019	0.0593	0.0048	1167	20	1174	16	1163	91	1150	48	130.2	41.3	0.317204	1174	16
AP_45_157	1.61	0.067	0.1656	0.0034	0.0707	0.0031	0.0517	0.0085	971	26	988	19	1010	160	920	94	52.4	4.01	0.0765267	988	19
AP_45_158	1.644	0.06	0.1677	0.003	0.0711	0.0025	0.0486	0.0084	985	23	999	17	950	160	944	73	51.6	4.06	0.0786822	999	17
AP_45_159	1.72	0.034	0.1701	0.0047	0.0725	0.0012	0.0617	0.0061	1016	13	1012	26	1209	120	999	35	1241	25.4	0.0204674	1012	26
AP_45_160	1.457	0.059	0.1477	0.0031	0.0715	0.002	0.0467	0.0035	911	24	888	17	922	68	966	55	126.9	113.3	0.892829	888	17
AP_45_161	1.703	0.043	0.1717	0.0027	0.072	0.002	0.0506	0.0044	1009	16	1021	15	997	84	977	56	66.8	25.53	0.382186	1021	15
EMP-16
EMP_16_1	2.275	0.068	0.202	0.0047	0.0807	0.002	0.055	0.015	1203	21	1186	35	1080	290	1211	50	227.1	2.72	0.0119771	1186	35
EMP_16_2	2.481	0.05	0.2146	0.0044	0.084	0.0013	0.063	0.0045	1266	15	1253	24	1234	86	1291	31	264.8	90.8	0.3429	1253	24
EMP_16_3	1.252	0.04	0.1189	0.0034	0.0764	0.0014	0.0467	0.0034	823	18	724	20	923	65	1101	37	422	131	0.310427	724	20
EMP_16_4	1.652	0.058	0.1633	0.004	0.0733	0.0018	0.0492	0.004	988	22	975	22	971	78	1015	49	176	47.3	0.26875	975	22
EMP_16_5	0.889	0.078	0.0869	0.0068	0.0737	0.0015	0.0254	0.0032	635	41	535	40	507	64	1037	37	1548	302	0.19509	535	40
EMP_16_6	1.615	0.051	0.1616	0.0059	0.0726	0.0012	0.0477	0.0036	975	20	965	33	942	69	1002	35	982	234.4	0.238697	965	33
EMP_16_7	1.692	0.029	0.169	0.0028	0.0727	0.0012	0.0513	0.0037	1005	11	1006	16	1010	71	1001	35	315	208	0.660317	1006	16
EMP_16_8	1.681	0.08	0.1681	0.0038	0.0725	0.0031	0.0514	0.0059	997	30	1001	21	1012	110	975	88	33.9	12.96	0.382301	1001	21
EMP_16_9	1.718	0.083	0.1683	0.0034	0.074	0.0034	0.0506	0.0041	1010	31	1003	19	997	78	1036	88	26.7	32	1.1985	1003	19
EMP_16_10	2.15	0.072	0.1948	0.0049	0.08	0.0027	0.0609	0.0048	1164	24	1147	26	1194	92	1191	65	160.5	98	0.610592	1147	26
EMP_16_11	2.138	0.055	0.1971	0.0033	0.0787	0.0018	0.0585	0.0043	1160	18	1159	18	1150	82	1157	45	140.1	88.8	0.633833	1159	18
EMP_16_12	2.525	0.064	0.2167	0.0034	0.0845	0.0018	0.0643	0.0051	1278	19	1264	18	1259	96	1298	41	114.6	37.5	0.327225	1264	18
EMP_16_13	2.57	0.11	0.2177	0.0063	0.0855	0.0027	0.0654	0.0056	1291	30	1269	33	1280	110	1323	60	169	55	0.325444	1269	33
EMP_16_14	1.688	0.064	0.1657	0.0031	0.0738	0.0024	0.0484	0.0042	1001	24	988	17	955	80	1022	67	51	30.2	0.592157	988	17
EMP_16_15	1.595	0.064	0.1621	0.003	0.0715	0.0029	0.0502	0.0044	965	25	968	17	989	85	948	82	42.3	19.23	0.45461	968	17
EMP_16_16	1.701	0.044	0.1704	0.0034	0.0725	0.0019	0.0518	0.0043	1008	17	1014	19	1020	84	991	54	83.7	42.4	0.506571	1014	19
EMP_16_17	1.735	0.068	0.1729	0.0035	0.0724	0.0027	0.053	0.0049	1018	25	1028	19	1042	93	979	75	31.5	18.1	0.574603	1028	19
EMP_16_18	1.711	0.046	0.1694	0.003	0.0733	0.0019	0.0538	0.0045	1011	17	1009	17	1059	85	1012	55	142.5	38.8	0.272281	1009	17
EMP_16_19	1.638	0.027	0.164	0.0025	0.0728	0.0011	0.0506	0.0036	984.7	10	979	14	997	70	1006	29	692	244	0.352601	979	14
EMP_16_20	1.708	0.048	0.1691	0.0035	0.0733	0.0016	0.0504	0.0037	1010	18	1007	19	994	70	1015	44	177.8	126	0.708661	1007	19
EMP_16_21	2.029	0.056	0.189	0.0049	0.0777	0.0014	0.0586	0.0047	1125	19	1116	27	1151	89	1138	36	824	107	0.129854	1116	27
EMP_16_22	2.457	0.051	0.2146	0.0032	0.0829	0.0016	0.066	0.0054	1259	15	1253	17	1291	100	1274	33	157.6	52.38	0.33236	1253	17
EMP_16_23	2.616	0.085	0.2214	0.0047	0.0856	0.0019	0.0686	0.0054	1302	24	1289	25	1341	100	1322	43	95.7	37.8	0.394984	1289	25
EMP_16_24	1.668	0.047	0.1638	0.0027	0.0739	0.002	0.0502	0.0046	995	18	977	15	989	89	1028	56	67.4	23.37	0.346736	977	15
EMP_16_25	3.07	0.14	0.1979	0.0044	0.1127	0.0048	0.1076	0.0092	1419	35	1164	23	2060	170	1819	82	33.6	18.6	0.553571	1164	23
EMP_16_26	1.79	0.066	0.1713	0.0041	0.076	0.0032	0.0527	0.0051	1040	24	1019	23	1037	98	1084	83	88.8	46.2	0.52027	1019	23
EMP_16_27	1.594	0.035	0.1597	0.0026	0.0724	0.0014	0.049	0.0037	967	14	955	15	966	71	993	39	304	131.5	0.432566	955	15
EMP_16_28	1.678	0.06	0.1577	0.0046	0.0775	0.0014	0.0274	0.0028	1004	20	944	26	545	55	1131	37	299	45.7	0.152843	944	26
EMP_16_29	1.66	0.073	0.1671	0.0035	0.072	0.0028	0.0559	0.0059	989	28	996	19	1097	110	965	79	44.9	8.38	0.186637	996	19
EMP_16_30	1.682	0.045	0.1684	0.0027	0.0724	0.0018	0.05	0.0037	1000	17	1003	15	985	70	990	51	151	76.9	0.509272	1003	15
EMP_16_31	1.675	0.05	0.1674	0.0037	0.0726	0.0018	0.0522	0.004	997	19	997	21	1028	76	995	50	231	89.5	0.387446	997	21
EMP_16_32	2.47	0.046	0.2159	0.004	0.083	0.0014	0.0635	0.0048	1262	13	1260	21	1245	91	1267	33	264	104	0.393939	1260	21
EMP_16_33	1.75	0.052	0.1622	0.0052	0.0785	0.0019	0.0516	0.0041	1026	19	968	29	1017	78	1155	50	448	83.3	0.185938	968	29
EMP_16_34	1.71	0.04	0.1681	0.0031	0.0738	0.0014	0.0519	0.0038	1011	15	1001	17	1023	73	1031	40	315	164.8	0.523175	1001	17
EMP_16_35	3.471	0.076	0.2633	0.0043	0.0952	0.0017	0.0811	0.0061	1519	17	1507	22	1576	110	1536	38	124.1	67.6	0.544722	1536	38
EMP_16_36	1.69	0.076	0.167	0.0038	0.0734	0.0031	0.0506	0.0042	1001	29	995	21	997	80	1002	83	36.7	41.4	1.12807	995	21
EMP_16_37	1.64	0.051	0.1653	0.0033	0.072	0.0022	0.0521	0.0045	984	20	986	18	1026	86	975	60	76.4	32	0.418848	986	18
EMP_16_38	1.668	0.047	0.1688	0.0036	0.0717	0.0016	0.0522	0.0041	995	18	1005	20	1028	79	971	46	95.6	36.6	0.382845	1005	20
EMP_16_39	1.83	0.12	0.1549	0.0061	0.0862	0.0053	0.0556	0.0055	1054	42	928	34	1094	100	1330	120	62.7	36.4	0.580542	928	34
EMP_16_40	0.1996	0.0047	0.0292	0.00048	0.0496	0.0011	0.0084	0.00081	184.7	4	185.5	3	169	16	160	54	1003	105.2	0.104885	185.5	3
EMP_16_41	0.91	0.1	0.0962	0.0066	0.0676	0.0048	0.0229	0.003	649	56	592	39	456	60	830	150	144.6	59.9	0.414246	592	39
EMP_16_42	1.83	0.11	0.1756	0.0052	0.0761	0.0049	0.074	0.013	1057	36	1042	28	1430	250	1080	120	12.78	2.39	0.187011	1042	28
EMP_16_43	2.303	0.056	0.2046	0.004	0.0816	0.0014	0.0603	0.0043	1212	17	1200	21	1184	82	1234	33	260	104	0.4	1200	21
EMP_16_44	2.622	0.04	0.2227	0.0041	0.0853	0.0014	0.0694	0.0051	1306.5	11	1296	21	1356	97	1321	31	368	105.8	0.2875	1296	21
EMP_16_45	1.465	0.069	0.1379	0.0056	0.0766	0.0013	0.0419	0.0033	912	29	832	32	829	64	1115	39	745	310	0.416107	832	32
EMP_16_46	0.722	0.022	0.0737	0.0019	0.07089	0.0011	0.02049	0.0015	551	13	459	11	409.9	29	952	31	1458	704	0.482853	459	11
EMP_16_47	1.908	0.057	0.1836	0.004	0.0754	0.0018	0.0562	0.0045	1082	20	1086	22	1105	85	1071	47	195	57.6	0.295385	1086	22
EMP_16_48	2.212	0.046	0.2001	0.0034	0.0803	0.0013	0.0593	0.0043	1184	15	1176	18	1164	83	1202	32	1128	172	0.152482	1176	18
EMP_16_49	1.593	0.038	0.1465	0.0029	0.07881	0.001	0.0526	0.0046	967	15	881	16	1035	88	1166	25	1206	80.6	0.0668325	881	16
EMP_16_50	1.817	0.056	0.1708	0.0042	0.0772	0.0016	0.0578	0.0044	1051	20	1016	23	1135	84	1124	41	527	101	0.191651	1016	23
EMP_16_51	2.597	0.056	0.2203	0.0037	0.0855	0.0016	0.0667	0.0048	1299	16	1283	19	1306	91	1325	36	298	99.4	0.333557	1283	19
EMP_16_52	2.794	0.087	0.2293	0.0051	0.0883	0.0027	0.0762	0.006	1353	23	1331	27	1484	110	1383	59	177.9	78.5	0.441259	1331	27
EMP_16_53	1.873	0.095	0.179	0.0059	0.0756	0.002	0.053	0.0045	1066	33	1061	32	1043	87	1075	51	214.7	106.3	0.495109	1061	32
EMP_16_54	2.021	0.062	0.1917	0.0045	0.0764	0.0015	0.0582	0.0053	1121	21	1130	25	1143	100	1102	40	368	24.3	0.0660326	1130	25
EMP_16_55	2.179	0.05	0.1991	0.0028	0.0798	0.0018	0.0614	0.0047	1173	16	1170	15	1205	89	1186	44	258	85.7	0.332171	1170	15
EMP_16_56	1.892	0.048	0.1815	0.0022	0.0754	0.0016	0.0564	0.0044	1077	17	1075	12	1109	85	1073	41	241.5	58.5	0.242236	1075	12
EMP_16_57	2.081	0.072	0.1916	0.0037	0.0788	0.0025	0.0603	0.0059	1140	24	1130	20	1181	110	1153	63	74.7	29.8	0.398929	1130	20
EMP_16_58	1.986	0.066	0.1866	0.004	0.0773	0.0025	0.0577	0.0049	1108	23	1103	22	1134	94	1115	65	95.3	39.06	0.409864	1103	22
EMP_16_59	2.71	0.12	0.2239	0.0037	0.0881	0.0032	0.0697	0.006	1331	32	1303	19	1361	110	1380	69	676	248	0.366864	1303	19
EMP_16_60	2.594	0.05	0.2216	0.0032	0.0849	0.0014	0.0652	0.0049	1298	14	1290	17	1276	94	1310	31	563	213	0.37833	1290	17
EMP_16_61	2.499	0.081	0.2162	0.0047	0.0837	0.0016	0.0661	0.0049	1269	24	1261	25	1293	92	1281	39	428	138	0.32243	1261	25
EMP_16_62	1.741	0.044	0.1703	0.0024	0.0741	0.0018	0.0502	0.0039	1022	16	1017	13	989	75	1038	48	337	106.7	0.316617	1017	13
EMP_16_63	1.741	0.056	0.1705	0.0032	0.074	0.002	0.0501	0.0045	1022	20	1014	17	987	86	1033	54	107.5	49.6	0.461395	1014	17
EMP_16_64	0.44	0.032	0.0519	0.003	0.0608	0.0014	0.0202	0.0019	367	22	326	18	404	37	624	51	3310	145	0.0438066	326	18
EMP_16_65	1.714	0.038	0.1676	0.0026	0.0742	0.0014	0.0507	0.0041	1013	14	999	15	999	79	1043	39	1189	164.4	0.138267	999	15
EMP_16_66	1.608	0.041	0.1598	0.0038	0.0731	0.0013	0.0467	0.0039	973	16	956	21	922	75	1015	37	1891	122.7	0.0648863	956	21
EMP_16_67	0.223	0.021	0.0325	0.0012	0.0498	0.0045	0.0089	0.0013	204	18	205.8	7.4	179	25	180	180	262	68.3	0.260687	205.8	7.4
EMP_16_68	2.667	0.056	0.2269	0.0042	0.08555	0.0012	0.0651	0.0047	1318	16	1318	22	1274	89	1326	26	600	180.9	0.3015	1318	22
EMP_16_69	1.99	0.061	0.1844	0.0035	0.0783	0.0021	0.0575	0.0047	1111	21	1091	19	1129	90	1150	54	1022	115.3	0.112818	1091	19
EMP_16_70	2.809	0.082	0.2316	0.0052	0.088	0.0019	0.0715	0.0056	1356	22	1342	27	1395	110	1377	41	415	116.7	0.281205	1342	27
EMP_16_71	2.518	0.045	0.2076	0.003	0.088	0.0015	0.0669	0.0049	1276	13	1216	16	1309	100	1379	32	1034	329	0.318182	1216	16
EMP_16_72	3.158	0.096	0.247	0.0071	0.0927	0.0019	0.07	0.005	1446	23	1423	36	1368	94	1480	40	856	520	0.607477	1423	36
EMP_16_73	1.736	0.05	0.1752	0.0031	0.0719	0.002	0.052	0.0045	1020	19	1040	17	1023	86	974	56	206	83	0.402913	1040	17
EMP_16_74	1.807	0.066	0.1749	0.0034	0.0748	0.0023	0.0528	0.0047	1046	24	1039	19	1040	91	1053	63	331	114	0.344411	1039	19
EMP_16_75	1.65	0.061	0.1617	0.0034	0.0741	0.0025	0.0478	0.0036	987	23	966	19	943	70	1030	65	162.5	110.9	0.682462	966	19
EMP_16_76	1.719	0.057	0.1715	0.0032	0.0727	0.0024	0.0513	0.0041	1013	21	1020	18	1010	79	993	65	193	76.7	0.397409	1020	18
EMP_16_77	1.701	0.064	0.1703	0.0035	0.0725	0.0026	0.0522	0.0046	1006	24	1014	20	1027	89	981	75	142.4	43.6	0.30618	1014	20
EMP_16_78	1.68	0.065	0.165	0.0039	0.0739	0.0026	0.0537	0.0046	998	24	984	22	1056	88	1023	72	134.8	67.9	0.503709	984	22
EMP_16_79	2.427	0.078	0.2126	0.005	0.0826	0.0018	0.0655	0.0057	1249	24	1242	27	1283	110	1256	43	770	218	0.283117	1242	27
EMP_16_80	2.69	0.18	0.225	0.013	0.0867	0.0026	0.0687	0.0063	1321	49	1305	69	1340	120	1350	58	340	120	0.352941	1305	69
EMP_16_81	1.689	0.052	0.1658	0.0032	0.074	0.0024	0.0485	0.0043	1003	19	989	18	957	83	1031	65	209.7	67.6	0.322365	989	18
EMP_16_82	1.83	0.14	0.1667	0.0098	0.0793	0.0033	0.0557	0.0052	1052	51	993	53	1096	99	1172	85	324	124.2	0.383333	993	53
EMP_16_83	1.694	0.034	0.166	0.0033	0.0737	0.0014	0.0489	0.0039	1005	13	990	18	965	75	1029	39	425	120.4	0.283294	990	18
EMP_16_84	1.674	0.035	0.1664	0.0032	0.0731	0.0013	0.0495	0.0037	998	13	992	18	976	72	1015	36	1219	337	0.276456	992	18
EMP_16_85	1.695	0.037	0.168	0.0025	0.0731	0.0014	0.0517	0.0038	1006	14	1001	14	1018	74	1013	40	308	124.8	0.405195	1001	14
EMP_16_86	1.917	0.065	0.1694	0.0049	0.082	0.0013	0.0588	0.0045	1084	22	1008	27	1154	86	1243	30	1328	170.7	0.128539	1008	27
EMP_16_87	2.505	0.078	0.2199	0.0049	0.0834	0.0024	0.0647	0.0056	1271	23	1281	26	1265	110	1267	57	147	56	0.380952	1281	26
EMP_16_88	1.651	0.057	0.1631	0.0044	0.0733	0.0023	0.0526	0.0044	989	22	974	24	1036	85	1019	63	987	339	0.343465	974	24
EMP_16_89	1.689	0.039	0.1666	0.0025	0.0735	0.0015	0.0514	0.0038	1003	15	993	14	1014	72	1023	40	238	125.9	0.528992	993	14
EMP_16_90	1.454	0.046	0.1193	0.0024	0.0885	0.0028	0.0724	0.0072	910	19	727	14	1410	140	1387	59	118.6	23.2	0.195616	727	14
EMP_16_91	2.562	0.074	0.2208	0.0039	0.0841	0.0021	0.0642	0.0054	1288	21	1286	21	1256	100	1288	49	121	44	0.363636	1286	21
EMP_16_92	2.12	0.13	0.1914	0.0064	0.08	0.0036	0.0623	0.0076	1152	40	1129	34	1220	140	1187	89	85.7	18.44	0.215169	1129	34
EMP_16_93	1.643	0.024	0.1637	0.0022	0.07305	0.0011	0.0517	0.0038	986.6	9	977	12	1019	72	1013	29	377	183.9	0.487798	977	12
EMP_16_94	1.952	0.038	0.1844	0.0029	0.0768	0.0012	0.0572	0.004	1098	13	1091	16	1124	77	1112	33	439	217.1	0.494533	1091	16
EMP_16_95	1.917	0.051	0.1811	0.0033	0.0767	0.0021	0.0543	0.0044	1087	18	1073	18	1068	84	1109	54	549	161.7	0.294536	1073	18
EMP_16_96	2.052	0.045	0.1904	0.0032	0.0787	0.0019	0.0577	0.0042	1132	15	1123	17	1133	81	1158	47	139.3	111.2	0.798277	1123	17
EMP_16_97	1.764	0.057	0.17	0.0031	0.0744	0.0016	0.0506	0.0037	1031	21	1012	17	998	71	1058	50	120.8	74.6	0.61755	1012	17
EMP_16_98	1.698	0.042	0.1676	0.0024	0.0736	0.0021	0.0515	0.0043	1007	16	999	13	1014	83	1020	56	53.3	24.5	0.459662	999	13
EMP_16_99	1.606	0.033	0.1613	0.0025	0.0726	0.0013	0.0506	0.0037	975	14	964	14	998	72	999	35	424	50.4	0.118868	964	14
EMP_16_100	1.702	0.034	0.1691	0.0024	0.073	0.0014	0.0536	0.004	1009	13	1007	13	1055	76	1010	40	156.3	46.3	0.296225	1007	13
EMP_16_101	2.211	0.044	0.1996	0.0031	0.0803	0.0015	0.0572	0.0042	1184	14	1173	17	1124	79	1201	38	415.6	270	0.649663	1173	17
EMP_16_102	2.048	0.054	0.1927	0.0041	0.0771	0.0013	0.0585	0.0045	1130	18	1136	22	1149	85	1120	34	301	41.9	0.139203	1136	22
EMP_16_103	1.781	0.046	0.1769	0.0033	0.0729	0.0018	0.0521	0.004	1038	17	1050	18	1026	77	1020	44	107.6	72.1	0.670074	1050	18
EMP_16_104	1.711	0.032	0.1691	0.0024	0.0737	0.0011	0.0505	0.0038	1012	12	1007	13	996	72	1030	31	220	72.9	0.331364	1007	13
EMP_16_105	1.64	0.046	0.1616	0.0046	0.0738	0.0017	0.0522	0.0039	985	18	965	26	1028	76	1032	48	198.6	56.2	0.282981	965	26
EMP_16_106	1.713	0.049	0.1676	0.0028	0.0741	0.0019	0.0573	0.005	1012	19	999	15	1126	95	1036	52	61	17.94	0.294098	999	15
EMP_16_107	1.758	0.032	0.1709	0.0028	0.0746	0.0012	0.0544	0.0039	1030	12	1017	15	1070	75	1056	32	229.9	68.05	0.295998	1017	15
EMP_16_108	2.51	0.11	0.2182	0.0069	0.0831	0.002	0.0649	0.0058	1269	36	1271	37	1269	110	1263	48	106.7	43.7	0.40956	1271	37
EMP_16_109	1.129	0.058	0.1042	0.0043	0.0783	0.0014	0.0404	0.0033	764	28	638	25	801	64	1151	36	471	110.7	0.235032	638	25
EMP_16_110	1.699	0.072	0.1684	0.0035	0.0729	0.0032	0.053	0.0052	1005	27	1003	19	1042	100	986	89	17.34	9.48	0.546713	1003	19
EMP_16_111	2.18	0.16	0.174	0.011	0.0904	0.0015	0.0529	0.0049	1162	48	1030	59	1041	94	1431	32	505	413	0.817822	1030	59
EMP_16_112	1.671	0.036	0.1662	0.003	0.0729	0.0012	0.05	0.0036	1000	14	991	17	986	69	1008	35	289	82.2	0.284429	991	17
EMP_16_113	1.737	0.072	0.1711	0.0034	0.073	0.0028	0.0492	0.0049	1019	27	1018	19	969	93	1010	89	25.5	8.2	0.321569	1018	19
EMP_16_114	1.748	0.069	0.1698	0.0034	0.0747	0.0028	0.0556	0.0055	1023	25	1011	19	1092	100	1061	66	22.6	15.42	0.682301	1011	19
EMP_16_115	1.58	0.055	0.16	0.0029	0.0716	0.002	0.05	0.0043	960	21	956	16	986	83	964	58	52.6	27.3	0.519011	956	16
EMP_16_116	1.67	0.03	0.1667	0.0024	0.0727	0.0012	0.0517	0.0038	997	11	994	13	1018	74	1002	34	246	62.5	0.254065	994	13
EMP_16_117	0.1925	0.0081	0.02859	0.00035	0.0489	0.0021	0.00892	0.00079	178.5	6.9	181.7	2.2	179	16	140	89	206	83.9	0.407282	181.7	2.2
EMP_16_118	0.212	0.012	0.02899	0.0005	0.0528	0.0032	0.0105	0.0011	195	10	184.2	3.2	211	22	300	130	204	77.8	0.381373	184.2	3.2
EMP_16_119	1.7	0.1	0.1617	0.0055	0.0764	0.0046	0.0479	0.0057	1003	38	966	30	944	110	1080	120	26.7	14.85	0.55618	966	30
EMP_16_120	1.652	0.051	0.1635	0.003	0.0734	0.0023	0.0512	0.004	988	19	976	17	1009	78	1012	64	59.8	23.72	0.396656	976	17
EMP_16_121	0.205	0.023	0.02902	0.00085	0.0514	0.0058	0.0099	0.0019	187	20	184.4	5.3	198	38	200	210	22.97	11.3	0.491946	184.4	5.3
EMP_16_122	0.216	0.03	0.02824	0.00098	0.0558	0.0076	0.0095	0.0015	196	25	179.5	6.1	191	30	350	260	26.11	19.93	0.763309	179.5	6.1
EMP_16_123	2.621	0.063	0.2249	0.0036	0.0845	0.0015	0.0673	0.0048	1305	18	1307	19	1316	91	1301	34	210	82.4	0.392381	1307	19
EMP_16_124	2.783	0.055	0.232	0.0037	0.087	0.0014	0.0704	0.0051	1350	15	1345	20	1375	96	1358	31	253	119.3	0.471542	1345	20
EMP_16_125	2.156	0.039	0.1984	0.0035	0.0788	0.0011	0.0612	0.0045	1166	13	1167	19	1200	85	1166	29	474	217	0.457806	1167	19
EMP_16_126	1.699	0.045	0.1682	0.0034	0.0732	0.0016	0.0525	0.004	1007	17	1002	19	1035	77	1014	46	172.5	65.5	0.37971	1002	19
EMP_16_127	1.739	0.04	0.1619	0.0042	0.0776	0.0011	0.0499	0.0036	1022	16	967	23	983	70	1133	29	1007	248	0.246276	967	23
EMP_16_128	2.131	0.041	0.1953	0.0034	0.0791	0.0011	0.0614	0.0043	1158	13	1150	18	1204	82	1173	26	722	150.8	0.208864	1150	18
EMP_16_129	1.804	0.053	0.1692	0.0039	0.0777	0.0014	0.0584	0.0067	1046	19	1008	21	1147	130	1138	36	559	63.9	0.114311	1008	21
EMP_16_130	2.563	0.053	0.2187	0.0045	0.0852	0.0014	0.062	0.0043	1289	15	1275	24	1216	81	1317	32	444	268	0.603604	1275	24
EMP_16_131	1.728	0.039	0.1692	0.0024	0.0738	0.0015	0.0483	0.0034	1018	14	1008	13	953	66	1032	41	214	83.1	0.388318	1008	13
EMP_16_132	1.651	0.084	0.1624	0.005	0.0736	0.0021	0.0518	0.0055	989	31	970	28	1021	110	1028	56	298	77.6	0.260403	970	28
EMP_16_133	0.204	0.017	0.02855	0.00072	0.0524	0.0051	0.00974	0.00095	187	15	181.5	4.5	196	19	260	190	62.9	48.3	0.767886	181.5	4.5
EMP_16_134	0.185	0.012	0.02835	0.00063	0.0477	0.0032	0.00873	0.00077	172	10	180.2	3.9	176	15	120	140	137.2	147.4	1.07434	180.2	3.9
EMP_16_135	1.854	0.064	0.1719	0.0051	0.0781	0.0012	0.0607	0.0051	1062	23	1022	28	1191	98	1146	31	488	47.2	0.0967213	1022	28
EMP_16_136	1.154	0.055	0.1073	0.0044	0.0778	0.0012	0.0368	0.0032	776	27	657	25	731	63	1140	31	712	279	0.391854	657	25
EMP_16_137	1.687	0.033	0.1694	0.0024	0.0723	0.0014	0.0517	0.0038	1003	12	1008	13	1019	73	990	39	155.6	72.3	0.464653	1008	13
EMP_16_138	0.846	0.051	0.0827	0.0043	0.0739	0.0013	0.046	0.0041	618	28	512	25	908	80	1036	36	1580	94.5	0.0598101	512	25
EMP_16_139	1.425	0.031	0.1379	0.0027	0.075	0.0013	0.0527	0.0038	898	13	833	15	1038	73	1064	35	402	130	0.323383	833	15
EMP_16_140	2.522	0.059	0.2199	0.0042	0.0832	0.0015	0.0656	0.0057	1277	17	1281	22	1282	110	1270	36	160	59.1	0.369375	1281	22
EMP_16_141	2.681	0.061	0.2267	0.0045	0.0858	0.0012	0.0687	0.0053	1322	17	1317	24	1343	100	1331	28	657	146.7	0.223288	1317	24
EMP_16_142	1.817	0.067	0.1687	0.0044	0.0784	0.003	0.0541	0.0048	1051	24	1005	24	1066	91	1152	74	281.8	75.8	0.268985	1005	24
EMP_16_143	1.923	0.072	0.1873	0.0039	0.0744	0.0023	0.053	0.0046	1086	25	1106	21	1042	89	1039	63	65.7	29.3	0.445967	1106	21
EMP_16_144	1.927	0.051	0.1827	0.003	0.0766	0.0021	0.0573	0.0048	1089	18	1081	16	1126	92	1101	55	85.1	45.7	0.537015	1081	16
EMP_16_145	1.659	0.043	0.1674	0.0033	0.0719	0.0016	0.051	0.0041	992	16	997	18	1006	78	977	46	211	86	0.407583	997	18
EMP_16_146	1.654	0.035	0.1643	0.0026	0.073	0.0011	0.0497	0.0037	990	13	980	14	980	72	1012	32	364	116.5	0.320055	980	14
EMP_16_147	2.574	0.083	0.2168	0.0047	0.0866	0.0025	0.0637	0.0044	1292	24	1265	25	1249	84	1347	57	265	455	1.71698	1265	25
EMP_16_148	1.708	0.04	0.1704	0.0028	0.0727	0.0017	0.0526	0.0039	1010	15	1014	16	1036	75	1000	47	153.4	69.3	0.45176	1014	16
EMP_16_149	2.83	0.062	0.2358	0.0041	0.087	0.0015	0.0706	0.0053	1362	16	1365	22	1378	99	1358	35	239	66.7	0.279079	1365	22
EMP_16_150	2.432	0.057	0.2114	0.0033	0.0835	0.0017	0.0635	0.0046	1251	17	1236	17	1244	87	1277	38	409	124	0.303178	1236	17
EMP_16_151	2.365	0.058	0.2072	0.0052	0.0828	0.0022	0.0645	0.0057	1231	18	1213	28	1263	110	1259	53	250	58.8	0.2352	1213	28
EMP-49A
EMP_49A_1	1.733	0.044	0.1718	0.0031	0.0732	0.0015	0.0534	0.0041	1020	16	1022	17	1051	78	1013	41	317	177	0.55836	1022	17
EMP_49A_2	1.676	0.051	0.1671	0.0025	0.0728	0.0021	0.0515	0.0042	998	19	996	14	1014	81	996	60	138.3	40.9	0.295734	996	14
EMP_49A_3	1.672	0.048	0.1672	0.0028	0.0727	0.002	0.0505	0.0039	1001	20	997	16	995	74	997	54	148.5	45.1	0.303704	997	16
EMP_49A_4	1.607	0.034	0.1607	0.0021	0.0725	0.0015	0.0482	0.0037	972	13	961	12	951	71	1005	39	248	70.8	0.285484	961	12
EMP_49A_5	1.684	0.068	0.1676	0.0032	0.0729	0.0027	0.0526	0.0043	999	26	999	19	1036	82	1013	68	92	38.6	0.419565	999	19
EMP_49A_6	1.731	0.048	0.1731	0.0048	0.0732	0.0016	0.0542	0.0046	1019	18	1029	26	1066	88	1013	44	211	54.4	0.25782	1029	26
EMP_49A_7	1.616	0.046	0.1617	0.0035	0.0727	0.0023	0.0502	0.0041	975	18	966	19	989	88	992	64	116	36.6	0.315517	966	19
EMP_49A_8	1.202	0.04	0.1222	0.0043	0.0713	0.0016	0.0471	0.0041	801	18	743	25	930	79	964	46	813	114.6	0.140959	743	25
EMP_49A_9	1.747	0.043	0.1719	0.0032	0.0737	0.0012	0.0586	0.0054	1025	16	1022	18	1150	100	1030	33	626	97	0.154952	1022	18
EMP_49A_10	1.617	0.044	0.1635	0.0026	0.0713	0.0018	0.05	0.0041	976	15	976	14	986	79	957	52	246	83.1	0.337805	976	14
EMP_49A_11	1.675	0.053	0.1672	0.0029	0.0727	0.0022	0.049	0.0047	997	20	997	16	966	91	994	61	78.7	15.06	0.19136	997	16
EMP_49A_12	1.653	0.076	0.1624	0.003	0.0738	0.0031	0.0482	0.006	987	29	970	17	949	110	1012	87	42.2	10.3	0.244076	970	17
EMP_49A_13	1.94	0.15	0.192	0.01	0.0735	0.0046	0.0484	0.0053	1091	50	1131	56	954	100	1010	120	50.4	39.26	0.778968	1131	56
EMP_49A_14	1.685	0.058	0.1679	0.0031	0.0728	0.0023	0.0504	0.0041	1001	22	1000	17	993	78	995	69	92.5	34.2	0.36973	1000	17
EMP_49A_15	1.701	0.046	0.1705	0.0031	0.0723	0.0016	0.0521	0.004	1007	18	1015	17	1026	77	989	46	119.1	51.6	0.433249	1015	17
EMP_49A_16	1.661	0.091	0.1614	0.0032	0.0747	0.004	0.0481	0.0079	989	35	965	18	950	150	1030	110	40.5	3.06	0.0755556	965	18
EMP_49A_17	1.714	0.094	0.1726	0.0046	0.0712	0.0035	0.055	0.012	1007	35	1026	25	1070	220	950	110	16.1	1.79	0.11118	1026	25
EMP_49A_18	1.584	0.096	0.1657	0.004	0.0695	0.0041	0.0517	0.0069	957	38	988	22	1010	130	860	120	25.32	5.72	0.225908	988	22
EMP_49A_19	1.68	0.066	0.167	0.003	0.073	0.0026	0.0502	0.0075	1004	24	995	17	990	140	997	71	57.2	5.89	0.102972	995	17
EMP_49A_20	1.695	0.05	0.1672	0.0028	0.0736	0.002	0.0502	0.004	1005	19	996	16	989	77	1019	58	78.7	38.4	0.487929	996	16
EMP_49A_21	1.666	0.062	0.1652	0.0032	0.0733	0.0028	0.0512	0.0056	993	24	986	18	1008	110	1001	79	46.5	10.42	0.224086	986	18
EMP_49A_22	1.7	0.12	0.1706	0.0047	0.0722	0.0047	0.05	0.0093	998	44	1015	26	1020	190	930	130	19.1	3.44	0.180105	1015	26
EMP_49A_23	2.079	0.066	0.193	0.0038	0.0782	0.0021	0.0563	0.0044	1140	22	1137	21	1106	84	1141	57	90.4	66.4	0.734513	1137	21
EMP_49A_24	1.77	0.19	0.1797	0.0081	0.0726	0.0084	0.066	0.018	1027	64	1064	44	1350	370	850	230	5.7	1.26	0.221053	1064	44
EMP_49A_25	1.69	0.055	0.1688	0.0028	0.0727	0.0023	0.0518	0.0043	1003	21	1006	15	1020	83	990	66	102	39.9	0.391176	1006	15
EMP_49A_26	1.733	0.069	0.1692	0.0032	0.0744	0.003	0.0512	0.0062	1017	26	1008	18	1007	120	1050	74	34.9	14.44	0.413754	1008	18
EMP_49A_27	1.737	0.07	0.1693	0.0037	0.0744	0.0027	0.0519	0.0044	1019	26	1008	21	1023	85	1035	76	43.7	27.1	0.620137	1008	21
EMP_49A_28	1.644	0.048	0.1668	0.0031	0.0716	0.002	0.0528	0.0042	985	18	994	17	1039	80	962	59	91.5	34.7	0.379235	994	17
EMP_49A_29	1.57	0.042	0.159	0.0028	0.0719	0.0019	0.0481	0.0036	961	18	951	16	950	69	973	54	150.2	79.8	0.531292	951	16
EMP_49A_30	1.609	0.059	0.1664	0.0038	0.0702	0.0021	0.0519	0.0042	971	23	992	21	1022	81	938	67	64.6	27.9	0.431889	992	21
EMP_49A_31	2.513	0.073	0.2157	0.0049	0.0844	0.0019	0.0629	0.0056	1275	21	1259	26	1233	110	1299	44	220.3	55.4	0.251475	1259	26
EMP_49A_32	1.681	0.043	0.1677	0.0025	0.0727	0.0015	0.0503	0.0039	1000	16	999	14	992	74	999	42	184.1	111.3	0.604563	999	14
EMP_49A_33	1.69	0.049	0.1676	0.0031	0.0732	0.002	0.0502	0.004	1003	18	999	17	990	77	1010	58	120	33.4	0.278333	999	17
EMP_49A_34	1.648	0.046	0.1662	0.003	0.0719	0.0014	0.0506	0.0039	987	18	991	17	997	75	977	40	208.8	88.9	0.425766	991	17
EMP_49A_35	1.697	0.067	0.1644	0.0039	0.0751	0.002	0.05	0.0044	1017	33	981	22	985	85	1066	56	163.1	46	0.282036	981	22
EMP_49A_36	1.7	0.043	0.1688	0.0032	0.0736	0.0016	0.0516	0.004	1007	16	1005	18	1016	77	1024	45	96.4	41.1	0.426349	1005	18
EMP_49A_37	1.715	0.078	0.1712	0.004	0.0729	0.0034	0.053	0.0058	1010	29	1018	22	1042	110	979	99	34	12.4	0.364706	1018	22
EMP_49A_38	1.686	0.043	0.1683	0.0029	0.0727	0.0017	0.0509	0.0041	1002	16	1003	16	1003	79	999	47	201	58.5	0.291045	1003	16
EMP_49A_39	1.589	0.037	0.1599	0.0025	0.0722	0.0014	0.0517	0.0046	965	15	956	14	1018	88	988	39	195.5	42.4	0.21688	956	14
EMP_49A_40	1.714	0.042	0.1685	0.003	0.0738	0.0016	0.05	0.0039	1013	16	1004	17	985	75	1029	47	183.7	51.6	0.280893	1004	17
EMP_49A_41	1.703	0.041	0.1708	0.0031	0.0724	0.0014	0.0522	0.004	1008	15	1016	17	1028	76	991	41	253	104	0.411067	1016	17
EMP_49A_42	1.648	0.056	0.1677	0.0029	0.0714	0.0025	0.0506	0.0039	986	21	999	16	998	75	951	71	83.3	58	0.696279	999	16
EMP_49A_43	1.691	0.059	0.1648	0.0032	0.0739	0.0023	0.0498	0.0041	1004	22	989	21	982	78	1031	63	132.1	40.4	0.305829	989	21
EMP_49A_44	1.675	0.039	0.1666	0.0024	0.0734	0.0017	0.0513	0.004	1002	16	993	13	1011	76	1018	45	168	43.2	0.257143	993	13
EMP_49A_45	1.688	0.044	0.1684	0.0027	0.0728	0.0019	0.0504	0.0044	1003	17	1003	15	992	84	1011	48	139.7	37.4	0.267717	1003	15
EMP_49A_46	1.893	0.05	0.1795	0.0038	0.0764	0.0014	0.0512	0.0049	1078	17	1064	21	1008	94	1115	28	1064	41	0.0385338	1064	21
EMP_49A_47	1.66	0.092	0.1676	0.0039	0.0719	0.0037	0.079	0.021	987	34	998	21	1510	380	950	110	25.5	0.806	0.0316078	998	21
EMP_49A_48	1.648	0.045	0.1673	0.0028	0.0715	0.0016	0.0499	0.0044	987	17	997	15	983	84	964	47	125.6	43.3	0.344745	997	15
EMP_49A_49	1.7	0.043	0.1684	0.0032	0.0733	0.0018	0.0498	0.004	1007	16	1003	18	982	77	1015	49	162.5	45.9	0.282462	1003	18
EMP_49A_50	1.641	0.05	0.163	0.0044	0.0729	0.0015	0.0505	0.0038	985	19	973	25	995	73	1009	43	1026	431	0.420078	973	25
EMP_49A_51	1.736	0.067	0.1685	0.0023	0.0747	0.0029	0.0532	0.005	1019	25	1004	13	1046	95	1042	78	68.9	17.56	0.254862	1004	13
EMP_49A_52	1.663	0.05	0.1661	0.0027	0.0723	0.0018	0.0511	0.004	993	19	990	15	1007	76	986	52	107.6	59.5	0.552974	990	15
EMP_49A_53	1.722	0.046	0.1727	0.0034	0.0728	0.0015	0.0528	0.0044	1016	17	1027	19	1039	84	1005	41	112.2	34.3	0.305704	1027	19
EMP_49A_54	1.723	0.048	0.172	0.0033	0.0727	0.0016	0.0513	0.0039	1016	18	1023	18	1011	74	999	46	193	110.6	0.573057	1023	18
EMP_49A_55	1.715	0.052	0.1695	0.0025	0.0737	0.0019	0.0512	0.0039	1012	20	1009	14	1008	74	1023	55	132.5	54.5	0.411321	1009	14
EMP_49A_56	1.406	0.052	0.1411	0.0029	0.0725	0.0026	0.0401	0.0033	889	22	850	16	795	63	979	75	75.5	51.6	0.683444	850	16
EMP_49A_57	1.718	0.044	0.1725	0.0026	0.0722	0.0016	0.0527	0.0039	1014	17	1026	14	1038	74	985	45	201	104.9	0.521891	1026	14
EMP_49A_58	1.77	0.037	0.1753	0.003	0.0729	0.0013	0.0509	0.0039	1034	14	1041	16	1003	76	1015	34	218	61.1	0.280275	1041	16
EMP_49A_59	1.474	0.045	0.1504	0.0022	0.071	0.0019	0.0443	0.0037	918	19	903	12	875	72	948	56	129.5	42	0.324324	903	12
EMP_49A_60	1.685	0.039	0.1666	0.003	0.0733	0.0015	0.0507	0.0038	1002	15	993	16	1008	74	1019	40	172.2	66.7	0.38734	993	16
EMP_49A_61	1.704	0.046	0.1675	0.003	0.0738	0.0019	0.0521	0.0044	1009	18	998	17	1025	84	1028	53	147.2	40.1	0.272418	998	17
EMP_49A_62	1.625	0.034	0.1641	0.0026	0.0718	0.0013	0.0507	0.0038	979	13	979	14	999	74	977	38	233	86.3	0.370386	979	14
EMP_49A_63	1.705	0.062	0.1728	0.0031	0.0709	0.0022	0.055	0.005	1008	23	1027	17	1081	95	942	65	71.5	23.6	0.33007	1027	17
EMP_49A_64	1.7	0.054	0.1664	0.0034	0.0742	0.0022	0.0506	0.0042	1007	20	992	19	998	81	1036	60	85.6	39.2	0.457944	992	19
EMP_49A_65	1.646	0.048	0.1651	0.003	0.0724	0.0019	0.0506	0.0039	986	18	985	17	997	75	1001	47	142.3	47.2	0.331694	985	17
EMP_49A_66	1.577	0.048	0.1586	0.0038	0.0722	0.0017	0.0469	0.004	959	19	948	21	926	77	983	49	153.3	45.5	0.296804	948	21
EMP_49A_67	1.743	0.051	0.1714	0.0029	0.0738	0.002	0.051	0.0044	1023	19	1020	16	1004	85	1025	56	93.2	38.5	0.41309	1020	16
EMP_49A_68	1.676	0.039	0.1673	0.0026	0.0727	0.0017	0.0518	0.0042	998	15	997	15	1020	81	999	47	115.2	53.1	0.460938	997	15
EMP_49A_69	1.673	0.029	0.1665	0.0025	0.07286	0.00089	0.04906	0.0034	997.9	11	993	14	968	66	1009	25	948	370	0.390295	993	14
EMP_49A_70	1.718	0.049	0.1712	0.0031	0.0728	0.0018	0.0526	0.0045	1013	18	1018	17	1035	86	1000	51	125.6	49.2	0.39172	1018	17
EMP_49A_71	1.643	0.026	0.1645	0.0024	0.07244	0.001	0.0509	0.0036	986.3	10	982	13	1003	68	996	29	673	301	0.447251	982	13
EMP_49A_72	1.789	0.059	0.1738	0.0036	0.0747	0.0016	0.0549	0.0047	1040	21	1033	20	1079	90	1055	42	239	88	0.368201	1033	20
EMP_49A_73	1.472	0.034	0.1521	0.0025	0.0707	0.0017	0.0512	0.0041	918	14	913	14	1009	79	942	50	118	53.8	0.455932	913	14
EMP_49A_74	1.69	0.052	0.1696	0.0037	0.0723	0.0019	0.052	0.0046	1003	20	1009	21	1025	87	986	55	89.7	28.6	0.318841	1009	21
EMP_49A_75	1.694	0.041	0.1669	0.003	0.0737	0.0017	0.0494	0.0043	1005	15	995	16	974	82	1027	47	140.9	37.4	0.265436	995	16
EMP_49A_76	1.647	0.041	0.1662	0.0024	0.0719	0.0016	0.0494	0.0037	987	15	991	13	974	72	975	45	176	96.1	0.546023	991	13
EMP_49A_77	1.686	0.041	0.1671	0.0025	0.0729	0.0017	0.0525	0.0042	1002	16	996	14	1034	80	1005	47	153.6	46.6	0.303385	996	14
EMP_49A_78	1.705	0.054	0.1686	0.0031	0.0731	0.0022	0.0497	0.0043	1009	20	1004	17	980	82	1004	62	65.1	32.3	0.49616	1004	17
EMP_49A_79	1.684	0.049	0.1684	0.003	0.0725	0.0016	0.051	0.004	1001	19	1003	17	1005	77	993	46	161	69.5	0.431677	1003	17
EMP_49A_80	1.829	0.065	0.1809	0.0038	0.0733	0.0019	0.0599	0.0059	1054	24	1071	21	1174	110	1015	56	93.5	14.34	0.153369	1071	21
EMP_49A_81	1.709	0.046	0.1705	0.003	0.0728	0.0018	0.0496	0.0039	1011	17	1014	16	978	75	1000	49	166.7	63.9	0.383323	1014	16
EMP_49A_82	1.735	0.048	0.1702	0.003	0.0739	0.0018	0.051	0.0041	1020	17	1013	16	1005	79	1032	50	127.3	39.9	0.313433	1013	16
EMP_49A_83	1.716	0.064	0.1707	0.0031	0.0729	0.0026	0.0503	0.0043	1012	24	1016	17	991	83	995	73	52.8	25.8	0.488636	1016	17
EMP_49A_84	1.707	0.035	0.1703	0.0026	0.0728	0.0014	0.0496	0.0044	1011	13	1014	14	977	85	1003	39	133.5	37	0.277154	1014	14
EMP_49A_85	1.715	0.062	0.1646	0.0043	0.0759	0.0029	0.0462	0.0044	1013	23	982	24	912	85	1084	79	119.3	53.6	0.449288	982	24
EMP_49A_86	1.799	0.075	0.1708	0.003	0.0764	0.0033	0.0527	0.005	1042	27	1016	16	1037	96	1087	84	55.5	32.3	0.581982	1016	16
EMP_49A_87	1.689	0.039	0.1685	0.0026	0.0727	0.0015	0.0518	0.0041	1003	15	1004	14	1020	71	1001	43	172.7	54.2	0.313839	1004	14
EMP_49A_88	1.687	0.053	0.1693	0.0032	0.0722	0.0018	0.0509	0.0042	1002	20	1008	18	1004	81	997	46	111.5	40.7	0.365022	1008	18
EMP_49A_89	1.589	0.044	0.158	0.0028	0.0731	0.0023	0.0503	0.004	965	17	946	16	992	77	1006	63	148.3	47.3	0.318948	946	16
EMP_49A_90	1.72	0.047	0.168	0.0036	0.0744	0.0016	0.05	0.004	1015	17	1001	20	985	76	1048	42	157	95	0.605096	1001	20
EMP_49A_91	0.186	0.025	0.0304	0.0012	0.0441	0.0051	0.0091	0.0013	172	21	192.9	7.4	183	25	-50	200	38.72	43	1.11054	192.9	7.4
EMP_49A_92	0.2112	0.0077	0.02959	0.00058	0.0518	0.0018	0.00921	0.00074	194.4	6.4	188	3.6	185.2	15	266	77	353.8	191.2	0.540418	188	3.6
EMP_49A_93	1.685	0.058	0.1675	0.0032	0.073	0.0021	0.0528	0.0046	1001	22	998	18	1040	88	1002	56	123	68	0.552846	998	18
EMP_49A_94	1.637	0.031	0.1649	0.0027	0.0721	0.0012	0.049	0.0036	984	12	984	15	967	70	992	33	232	86.4	0.372414	984	15
EMP_49A_95	1.79	0.098	0.1786	0.0059	0.0728	0.0037	0.0562	0.0092	1035	36	1059	32	1100	170	970	100	24.36	4.27	0.175287	1059	32
EMP_49A_96	1.678	0.043	0.1681	0.0027	0.0725	0.0019	0.0513	0.0044	999	17	1001	15	1010	84	990	53	108	39.7	0.367593	1001	15
EMP_49A_97	1.702	0.046	0.1702	0.0025	0.0726	0.0019	0.0494	0.0042	1008	17	1013	14	974	80	993	54	150.8	42	0.278515	1013	14
EMP_49A_98	1.683	0.045	0.1683	0.0028	0.0725	0.0018	0.0516	0.0043	1001	17	1003	15	1016	83	993	50	162.1	48.6	0.299815	1003	15
EMP_49A_99	1.672	0.045	0.1658	0.0027	0.0731	0.0017	0.0515	0.004	997	17	989	15	1015	77	1011	49	188.4	49.2	0.261146	989	15
EMP_49A_100	1.443	0.055	0.1464	0.0044	0.0715	0.0019	0.0479	0.004	906	23	880	25	946	78	965	54	291.4	147.5	0.506177	880	25
EMP_49A_101	1.655	0.037	0.1681	0.0028	0.0714	0.0013	0.0498	0.0039	990	14	1002	15	981	75	965	38	175.7	54.2	0.30848	1002	15
EMP_49A_102	1.678	0.063	0.168	0.0034	0.0723	0.0021	0.0506	0.004	997	24	1001	19	998	77	984	58	119.4	54.8	0.458961	1001	19
EMP_49A_103	1.682	0.061	0.1703	0.0032	0.0717	0.0025	0.0513	0.0048	999	23	1013	18	1011	93	962	71	71.9	18.06	0.251182	1013	18
EMP_49A_104	1.726	0.045	0.1722	0.0024	0.0727	0.0018	0.0538	0.0041	1017	17	1024	13	1058	79	998	50	190.1	56.4	0.296686	1024	13
EMP_49A_105	1.54	0.33	0.107	0.015	0.0941	0.0078	0.0636	0.01	870	120	651	84	1240	190	1420	160	747	353	0.472557	651	84
EMP_49A_106	1.636	0.039	0.1627	0.0025	0.073	0.0015	0.0515	0.0042	983	15	972	14	1015	80	1007	43	173	45.1	0.260694	972	14
EMP_49A_107	1.646	0.071	0.1637	0.0037	0.0731	0.0033	0.0489	0.0088	984	27	977	20	960	170	989	95	32.9	2.69	0.0817629	977	20
EMP_49A_108	1.683	0.048	0.1688	0.0027	0.0723	0.0018	0.0526	0.0039	1000	18	1005	15	1036	75	986	50	197.4	85.5	0.433131	1005	15
EMP_49A_109	1.706	0.044	0.1676	0.0031	0.0739	0.0018	0.0516	0.0038	1010	17	999	17	1017	73	1032	48	175	95.2	0.544	999	17
EMP_49A_110	1.612	0.043	0.1653	0.0028	0.0708	0.0017	0.0496	0.0037	974	17	986	16	979	70	943	50	172.3	103.2	0.598955	986	16
EMP_49A_111	1.72	0.046	0.1715	0.0028	0.0729	0.0021	0.0515	0.0041	1015	17	1020	15	1015	78	1000	58	118	55	0.466102	1020	15
EMP_49A_112	1.714	0.052	0.1707	0.0029	0.0728	0.0019	0.0514	0.004	1012	19	1016	16	1013	76	1000	53	134	42.8	0.319403	1016	16
EMP_49A_113	1.816	0.082	0.1687	0.0034	0.0785	0.0038	0.06	0.0074	1049	30	1005	19	1180	140	1144	100	125.4	43.4	0.346093	1005	19
EMP_49A_114	1.644	0.047	0.1637	0.0027	0.0729	0.0017	0.0488	0.0041	986	18	977	15	962	78	1007	48	174	56	0.321839	977	15
EMP_49A_115	1.68	0.042	0.1667	0.0027	0.0731	0.0016	0.0526	0.004	1000	16	994	15	1036	76	1012	44	210.5	60.4	0.286936	994	15
EMP_49A_116	1.641	0.043	0.1657	0.0024	0.0718	0.0017	0.0527	0.0041	985	16	988	13	1037	79	974	47	195.5	72.3	0.369821	988	13
EMP_49A_117	1.57	0.044	0.1579	0.0031	0.0722	0.002	0.0478	0.004	957	17	945	17	943	78	986	55	234	71.1	0.303846	945	17
EMP_49A_118	1.604	0.047	0.1614	0.003	0.0721	0.0019	0.0507	0.0041	970	18	964	16	999	79	980	54	156.2	56.5	0.361716	964	16
EMP_49A_119	2.07	0.074	0.1921	0.0029	0.0782	0.0026	0.0603	0.0052	1136	24	1132	16	1182	99	1137	65	70.1	22.1	0.315264	1132	16
EMP_49A_120	2.214	0.074	0.1962	0.0049	0.082	0.0023	0.0601	0.006	1184	23	1155	26	1179	110	1242	56	108.1	46.9	0.433858	1155	26
EMP_49A_121	1.733	0.054	0.1693	0.0037	0.0743	0.0016	0.0495	0.0048	1020	20	1008	20	977	92	1048	43	259.9	64.3	0.247403	1008	20
EMP_49A_122	1.711	0.044	0.1702	0.0037	0.0731	0.0019	0.0537	0.0042	1015	15	1013	20	1057	81	1008	52	134	84	0.626866	1013	20
EMP_49A_123	1.638	0.039	0.1639	0.0032	0.0726	0.0017	0.0498	0.004	984	15	978	17	982	77	995	48	133.7	63	0.471204	978	17
EMP_49A_124	0.22	0.034	0.0296	0.0011	0.0526	0.0084	0.009	0.0018	198	28	188	6.9	180	37	250	290	24.4	16.9	0.692623	188	6.9
EMP_49A_125	0.28	0.12	0.0303	0.0024	0.071	0.034	0.0098	0.0035	241	93	192	15	197	71	570	960	19.77	12.99	0.657056	192	15
EMP_49A_126	1.648	0.04	0.1658	0.0031	0.0722	0.0018	0.0516	0.0039	988	15	989	17	1017	74	984	51	199	86.1	0.432663	989	17
EMP_49A_127	1.68	0.083	0.1624	0.0049	0.0751	0.0037	0.0562	0.0094	998	31	970	27	1100	180	1054	96	57.1	9.23	0.161646	970	27
EMP_49A_128	1.685	0.048	0.1703	0.0028	0.0718	0.0017	0.0507	0.0047	1002	18	1014	15	999	91	974	50	89.5	39.4	0.440223	1014	15
EMP_49A_129	1.675	0.04	0.1677	0.0027	0.0725	0.0015	0.0515	0.0046	998	15	999	15	1014	89	994	43	184.7	40.6	0.219816	999	15
EMP_49A_130	1.604	0.051	0.1625	0.0032	0.0718	0.002	0.0485	0.0045	970	20	970	18	957	86	971	56	115.9	44.5	0.383952	970	18
EMP_49A_131	1.684	0.048	0.1654	0.003	0.0745	0.0019	0.0491	0.004	1001	18	987	17	969	77	1046	52	140	44.9	0.320714	987	17
EMP_49A_132	1.647	0.05	0.1653	0.0029	0.0722	0.0016	0.0515	0.0041	987	19	986	16	1014	79	986	45	204.4	52.4	0.25636	986	16
EMP_49A_133	1.679	0.047	0.1698	0.0031	0.0717	0.0017	0.0507	0.0043	999	18	1011	17	999	83	971	50	165.4	39.4	0.23821	1011	17
EMP_49A_134	1.74	0.042	0.1692	0.0024	0.0745	0.0018	0.0534	0.0042	1022	15	1007	13	1052	80	1046	49	176	85.1	0.483523	1007	13
EMP_49A_135	1.663	0.038	0.1679	0.0026	0.0723	0.0015	0.0488	0.0038	994	14	1000	14	963	73	989	43	177.3	57.4	0.323745	1000	14
EMP_49A_136	2.481	0.069	0.2134	0.0043	0.0839	0.0017	0.0656	0.005	1265	20	1246	23	1284	95	1285	39	116.8	51	0.436644	1246	23
EMP_49A_137	1.74	0.1	0.1732	0.004	0.0732	0.0042	0.071	0.014	1018	37	1029	22	1370	250	980	110	23.9	2.14	0.0895397	1029	22
EMP_49A_138	1.647	0.059	0.1673	0.0034	0.0714	0.0022	0.0511	0.0047	986	22	997	19	1006	90	958	60	70.9	17.41	0.245557	997	19
EMP_49A_139	1.663	0.068	0.165	0.0033	0.0727	0.0027	0.0544	0.0049	991	26	984	18	1071	93	988	76	78.9	21.5	0.272497	984	18
EMP_49A_140	0.186	0.017	0.02855	0.00089	0.0473	0.0041	0.00913	0.001	172	14	181.5	5.6	184	20	70	160	75.5	47.4	0.627815	181.5	5.6
EMP_49A_141	1.717	0.042	0.1705	0.0031	0.0731	0.0015	0.0515	0.0041	1014	15	1014	17	1015	79	1011	43	148.6	39	0.26245	1014	17
EMP_49A_142	1.744	0.047	0.1697	0.0027	0.0741	0.0016	0.0551	0.0046	1024	17	1011	15	1083	87	1049	48	175	77.1	0.440571	1011	15
EMP_49A_143	0.193	0.016	0.02872	0.00075	0.0477	0.0034	0.00897	0.00081	178	13	182.5	4.7	180	16	120	150	102.1	101.4	0.993144	182.5	4.7
EMP_49A_144	0.193	0.022	0.02836	0.00083	0.0495	0.0058	0.0085	0.001	177	19	180.2	5.2	171	20	140	210	45	45.4	1.00889	180.2	5.2
EMP_49A_145	0.204	0.032	0.029	0.001	0.051	0.0076	0.0081	0.0012	185	26	184.2	6.6	163	24	220	290	31.9	32.2	1.0094	184.2	6.6
EMP_49A_146	0.217	0.023	0.0288	0.00087	0.0551	0.0059	0.00883	0.0012	198	19	183	5.4	178	24	350	210	66.4	78.4	1.18072	183	5.4
EMP_49A_147	0.189	0.015	0.02838	0.0008	0.0488	0.0041	0.00916	0.001	175	13	180.4	5	184	20	130	160	77.6	57.3	0.738402	180.4	5
EMP_49A_148	0.203	0.025	0.02961	0.00098	0.0496	0.0058	0.00946	0.001	186	21	188	6.2	190	21	150	220	42.6	35.7	0.838028	188	6.2
EMP_49A_149	1.702	0.06	0.1677	0.0032	0.0736	0.0022	0.0508	0.0042	1012	25	999	18	1001	80	1034	69	109.3	36.8	0.336688	999	18
EMP_49A_150	0.207	0.023	0.02803	0.00098	0.0538	0.006	0.0085	0.0011	189	19	178.2	6.2	171	21	280	210	45.1	45.2	1.00222	178.2	6.2
EMP_49A_151	0.199	0.021	0.03034	0.00073	0.0477	0.005	0.0095	0.0013	183	18	192.7	4.6	192	26	70	190	45.4	45.6	1.00441	192.7	4.6
EMP_49A_152	0.345	0.03	0.03134	0.00065	0.08	0.0069	0.0136	0.0021	299	22	198.9	4.1	273	41	1110	160	72	34	0.472222	198.9	4.1
EMP_49A_153	0.18	0.02	0.02886	0.0009	0.0469	0.0054	0.00939	0.0012	171	19	183.4	5.6	189	23	40	200	33.2	35.2	1.06024	183.4	5.6
EMP_49A_154	0.194	0.027	0.0298	0.0012	0.0479	0.0066	0.0097	0.0014	177	23	189.4	7.3	195	29	80	250	23.09	18.85	0.816371	189.4	7.3
EMP_49A_155	0.191	0.018	0.03002	0.00099	0.0463	0.0042	0.00882	0.00099	177	15	190.6	6.2	177	20	20	160	53.2	47.5	0.892857	190.6	6.2
EMP_49A_156	0.238	0.039	0.0293	0.002	0.064	0.012	0.0095	0.0019	226	40	186	12	190	39	590	370	27.2	29.5	1.08456	186	12
CP-088
M1_CP088_1	1.61	0.041	0.161	0.0038	0.07273	0.00061	0.0479	0.0058	973	16	962	21	950	110	1002	17	241	100	0.414938	962	21
M1_CP088_2	1.381	0.059	0.1336	0.0045	0.0732	0.0017	0.0358	0.0073	878	22	808	25	710	140	1014	47	22	3	0.136364	808	25
M1_CP088_3	2.606	0.071	0.2242	0.0057	0.08432	0.00038	0.0665	0.0083	1301	20	1305	30	1300	160	1300.2	8.8	602	61	0.101329	1305	30
M1_CP088_4	2.532	0.067	0.2188	0.0052	0.08385	0.00068	0.0662	0.0079	1280	19	1275	28	1290	150	1286	16	137	87	0.635036	1275	28
M1_CP088_5	2.213	0.057	0.1985	0.0049	0.08085	0.00041	0.0669	0.0081	1184	19	1167	27	1310	150	1217	10	360	71	0.197222	1167	27
M1_CP088_6	2.958	0.075	0.2422	0.0057	0.08869	0.00069	0.0777	0.0094	1396	19	1398	30	1510	180	1395	15	171	64	0.374269	1398	30
M1_CP088_7	2.722	0.067	0.2294	0.0054	0.08596	0.00046	0.0684	0.0082	1334	18	1331	28	1340	150	1336	10	441	139	0.315193	1331	28
M1_CP088_8	2.213	0.056	0.2016	0.0047	0.07941	0.00064	0.0595	0.0071	1184	18	1184	26	1170	140	1181	16	190	169	0.889474	1184	26
M1_CP088_9	2.022	0.06	0.1935	0.005	0.0761	0.001	0.0581	0.0066	1121	21	1140	27	1140	130	1089	26	53	45	0.849057	1140	27
M1_CP088_10	2.255	0.057	0.1981	0.0047	0.08238	0.00065	0.0593	0.0071	1198	18	1165	25	1160	140	1251	16	162	90	0.555556	1165	25
M1_CP088_11	2.076	0.053	0.1922	0.0046	0.07831	0.00067	0.0534	0.0065	1140	18	1133	25	1050	120	1151	17	236	73	0.309322	1133	25
M1_CP088_12	1.977	0.054	0.1877	0.0045	0.07608	0.00094	0.057	0.0069	1106	19	1109	24	1120	130	1093	24	76	43	0.565789	1109	24
M1_CP088_13	2.354	0.063	0.2099	0.005	0.08106	0.00096	0.0613	0.0073	1227	19	1228	26	1200	140	1216	24	76	114	1.5	1228	26
M1_CP088_14	2.076	0.055	0.1925	0.0045	0.07801	0.00096	0.0571	0.007	1140	18	1135	25	1120	130	1144	24	87	40	0.45977	1135	25
M1_CP088_15	2.68	0.073	0.2274	0.0054	0.0852	0.0011	0.0623	0.0078	1321	20	1321	28	1220	150	1312	25	62	30	0.483871	1321	28
M1_CP088_16	1.784	0.047	0.177	0.0041	0.0728	0.00092	0.053	0.0065	1038	17	1050	23	1040	120	1007	25	87	34	0.390805	1050	23
M1_CP088_17	1.72	0.044	0.1692	0.0039	0.07335	0.00076	0.0486	0.0059	1015	17	1007	22	960	120	1019	21	134	77	0.574627	1007	22
M1_CP088_18	3.042	0.082	0.1874	0.0055	0.1179	0.0028	0.1	0.01	1416	22	1107	29	1930	190	1915	52	49	34	0.693878	1107	29
M1_CP088_19	0.151	0.019	0.02186	0.00081	0.0486	0.0046	0.007	0.0014	140	16	139.4	5.1	141	29	60	160	18	22	1.22222	139.4	5.1
M1_CP088_20	1.856	0.059	0.1732	0.0052	0.07717	0.00046	0.0566	0.0063	1060	22	1028	28	1110	120	1124	12	1382	399	0.288712	1028	28
M1_CP088_21	0.151	0.017	0.02186	0.00088	0.0497	0.0043	0.0055	0.0014	142	15	139.4	5.5	110	28	110	150	18	12	0.666667	139.4	5.5
M1_CP088_22	1.742	0.044	0.1702	0.004	0.07395	0.00058	0.0505	0.0062	1023	16	1013	22	1000	120	1037	16	299	133	0.444816	1013	22
M1_CP088_23	1.328	0.045	0.1223	0.0041	0.0779	0.00053	0.0654	0.0075	857	18	743	23	1280	150	1142	14	341	31	0.0909091	743	23
M1_CP088_24	2.38	0.069	0.2035	0.0048	0.084	0.002	0.0655	0.0094	1233	22	1194	25	1280	180	1276	44	29	16	0.551724	1194	25
M1_CP088_25	2.691	0.067	0.2261	0.0053	0.08583	0.00057	0.0669	0.008	1326	18	1314	28	1310	150	1333	13	209	105	0.502392	1314	28
M1_CP088_26	0.208	0.014	0.03114	0.00081	0.0489	0.0033	0.0084	0.0015	193	12	197.6	5.1	168	30	120	120	30	15	0.5	197.6	5.1
M1_CP088_27	1.709	0.054	0.1671	0.0043	0.0738	0.001	0.0499	0.0062	1010	19	996	23	980	120	1033	27	108	63	0.583333	996	23
M1_CP088_28	2.434	0.062	0.2095	0.0049	0.08378	0.00082	0.0634	0.0078	1253	19	1226	26	1240	150	1285	20	200	102	0.51	1226	26
M1_CP088_29	0.209	0.012	0.02972	0.00078	0.0511	0.0029	0.0087	0.0015	192	11	188.8	4.9	175	29	190	100	43	28	0.651163	188.8	4.9
M1_CP088_30	3.82	0.16	0.2076	0.0048	0.1318	0.0058	0.095	0.0091	1576	49	1215	26	1830	170	2040	110	18	22	1.22222	1215	26
M1_CP088_31	1.799	0.049	0.1754	0.0042	0.07404	0.00094	0.0524	0.0065	1045	18	1042	23	1030	120	1038	26	87	42	0.482759	1042	23
M1_CP088_32	0.2054	0.0098	0.02983	0.00075	0.0497	0.0021	0.009	0.0012	188.7	8.3	189.5	4.7	180	25	163	84	64	70	1.09375	189.5	4.7
M1_CP088_33	2.35	0.058	0.2087	0.0049	0.08101	0.00053	0.0636	0.0076	1227	18	1222	26	1250	140	1224	13	422	128	0.303318	1222	26
M1_CP088_34	1.975	0.054	0.1956	0.0048	0.07303	0.00081	0.0515	0.0064	1109	19	1151	26	1010	120	1010	22	102	68	0.666667	1151	26
M1_CP088_35	2.644	0.068	0.2234	0.0053	0.08515	0.00086	0.0649	0.0079	1312	19	1299	28	1270	150	1314	20	111	50	0.45045	1299	28
M1_CP088_36	1.518	0.04	0.1505	0.0038	0.07288	0.00044	0.0492	0.0059	937	17	904	22	970	110	1010	12	820	118	0.143902	904	22
M1_CP088_37	0.167	0.019	0.02318	0.00088	0.0521	0.0048	0.0069	0.0014	156	16	147.7	5.5	139	28	180	160	17	19	1.11765	147.7	5.5
M1_CP088_38	1.745	0.046	0.169	0.004	0.07501	0.00081	0.0505	0.0062	1025	17	1006	22	1000	120	1064	22	140	111	0.792857	1006	22
M1_CP088_39	1.764	0.044	0.1683	0.0041	0.07532	0.00046	0.0557	0.0067	1032	16	1003	22	1090	130	1077	12	580	187	0.322414	1003	22
M1_CP088_40	2.363	0.061	0.2155	0.005	0.07878	0.00083	0.0625	0.0074	1230	19	1258	27	1230	140	1161	21	96	84	0.875	1258	27
M1_CP088_41	1.721	0.043	0.1698	0.004	0.07306	0.00053	0.0513	0.0062	1016	16	1011	22	1010	120	1013	15	314	137	0.436306	1011	22
M1_CP088_42	1.868	0.061	0.1884	0.0044	0.0716	0.0019	0.0529	0.0065	1064	23	1112	25	1040	130	951	53	23	30	1.30435	1112	25
M1_CP088_43	2.645	0.067	0.2223	0.0052	0.08569	0.0007	0.0656	0.008	1312	19	1294	28	1280	150	1328	16	149	66	0.442953	1294	28
M1_CP088_44	1.716	0.058	0.1681	0.0048	0.07379	0.00097	0.0518	0.0073	1013	21	1001	27	1020	140	1028	26	95	31	0.326316	1001	27
M1_CP088_45	1.727	0.044	0.1706	0.0041	0.07282	0.00043	0.0532	0.0062	1018	17	1016	23	1050	120	1007	12	445	297	0.667416	1016	23
M1_CP088_46	2.273	0.066	0.2052	0.0056	0.0799	0.00067	0.0694	0.0089	1201	21	1203	30	1350	170	1194	17	278	43	0.154676	1203	30
M1_CP088_47	1.721	0.055	0.17	0.0052	0.07324	0.00055	0.05	0.006	1016	23	1012	30	990	110	1018	15	293	151	0.515358	1012	30
M1_CP088_48	2.409	0.06	0.2101	0.005	0.08302	0.00049	0.0629	0.0076	1245	18	1229	26	1230	140	1268	12	544	214	0.393382	1229	26
M1_CP088_49	1.731	0.044	0.1715	0.004	0.07285	0.00062	0.0542	0.0065	1019	16	1020	22	1070	120	1006	17	180	133	0.738889	1020	22
M1_CP088_50	1.74	0.047	0.1731	0.0041	0.0727	0.001	0.0519	0.0065	1023	18	1029	23	1020	120	996	28	68	39	0.573529	1029	23
M1_CP088_51	1.197	0.05	0.116	0.0037	0.0742	0.0016	0.0538	0.0072	797	21	707	21	1060	140	1040	38	112	49	0.4375	707	21
M1_CP088_52	1.742	0.044	0.171	0.004	0.07354	0.00066	0.0534	0.0064	1023	17	1018	22	1050	130	1025	18	191	100	0.52356	1018	22
M1_CP088_53	2.151	0.053	0.1967	0.0046	0.07934	0.00052	0.0589	0.0072	1165	17	1157	25	1160	140	1179	13	433	246	0.568129	1157	25
M1_CP088_54	1.69	0.043	0.1685	0.004	0.07255	0.0007	0.0522	0.0064	1004	16	1004	22	1030	120	997	19	178	51	0.286517	1004	22
M1_CP088_55	1.732	0.045	0.1706	0.004	0.07327	0.00077	0.053	0.0064	1019	17	1015	22	1040	120	1016	21	147	86	0.585034	1015	22
M1_CP088_56	2.762	0.072	0.2323	0.0055	0.08594	0.00083	0.0677	0.0083	1344	20	1346	29	1320	160	1332	19	99	41	0.414141	1346	29
M1_CP088_57	1.674	0.046	0.167	0.004	0.0727	0.001	0.0496	0.0061	998	18	996	22	980	120	1007	28	68	58	0.852941	996	22
M1_CP088_58	2.486	0.063	0.2167	0.0052	0.08319	0.00046	0.0681	0.0081	1268	19	1264	28	1330	150	1272	11	482	116	0.240664	1264	28
M1_CP088_59	1.691	0.043	0.1682	0.0039	0.07296	0.00066	0.0517	0.0062	1004	16	1002	22	1020	120	1009	18	250	94	0.376	1002	22
M1_CP088_60	2.616	0.067	0.2224	0.0054	0.08483	0.00047	0.0692	0.0083	1305	19	1294	28	1350	160	1310	11	368	164	0.445652	1294	28
M1_CP088_61	1.517	0.064	0.1367	0.0047	0.0787	0.0016	0.0461	0.007	934	22	826	26	910	130	1146	40	34	19	0.558824	826	26
M1_CP088_62	1.988	0.058	0.1886	0.0054	0.07619	0.00051	0.0605	0.0072	1110	21	1113	30	1190	140	1098	14	465	99	0.212903	1113	30
M1_CP088_63	0.141	0.016	0.02004	0.00084	0.0505	0.004	0.0067	0.0016	132	13	127.9	5.3	135	32	160	140	20	13	0.65	127.9	5.3
M1_CP088_64	2.648	0.075	0.228	0.0062	0.08396	0.00047	0.0734	0.0087	1311	21	1323	33	1430	160	1292	11	405	218	0.538272	1323	33
M1_CP088_65	0.207	0.01	0.02932	0.00075	0.0507	0.0023	0.0095	0.0013	190	8.7	186.3	4.7	191	25	216	90	61	49	0.803279	186.3	4.7
M1_CP088_66	1.641	0.046	0.1637	0.004	0.07289	0.00093	0.0484	0.0066	985	18	977	22	950	130	1008	25	184	88	0.478261	977	22
M1_CP088_67	1.193	0.055	0.1144	0.0041	0.074	0.0017	0.0392	0.0069	796	21	698	23	770	130	1031	47	24	5	0.208333	698	23
M1_CP088_68	0.1895	0.0059	0.02789	0.00067	0.0494	0.001	0.0082	0.0016	176	5	177.3	4.2	165	33	161	43	253	14	0.055336	177.3	4.2
M1_CP088_69	1.64	0.24	0.134	0.011	0.0875	0.0068	0.03	0.11	945	69	809	55	-300	1200	1130	170	2	0	0	809	55
M1_CP088_70	1.625	0.046	0.156	0.0039	0.0755	0.001	0.052	0.0074	978	18	934	22	1020	140	1080	27	115	11	0.0956522	934	22
M1_CP088_71	2.29	0.059	0.2052	0.0049	0.08077	0.00075	0.0621	0.0075	1208	18	1203	26	1220	140	1212	18	152	70	0.460526	1203	26
M1_CP088_72	1.676	0.043	0.1667	0.0039	0.07299	0.00071	0.0512	0.0063	999	16	994	22	1010	120	1013	20	198	55	0.277778	994	22
M1_CP088_73	47.2	5.2	0.587	0.046	0.575	0.03	0.62	0.17	3900	160	2970	190	9600	1700	4440	120	520	1045	2.00962	4440	120
M1_CP088_74	2.03	0.053	0.187	0.0044	0.07867	0.00079	0.0596	0.0071	1124	18	1105	24	1170	140	1160	20	131	51	0.389313	1105	24
M1_CP088_75	1.726	0.046	0.172	0.0043	0.07316	0.00049	0.0515	0.0065	1018	17	1023	24	1020	120	1016	14	435	148	0.34023	1023	24
M1_CP088_76	1.686	0.044	0.1684	0.004	0.07272	0.00072	0.0523	0.0063	1002	16	1003	22	1030	120	1001	20	177	87	0.491525	1003	22
M1_CP088_77	0.574	0.02	0.0626	0.0019	0.06675	0.00051	0.0219	0.0028	461	12	392	12	438	56	827	16	990	436	0.440404	392	12
M1_CP088_78	1.646	0.046	0.1634	0.0039	0.0734	0.001	0.05	0.0063	987	18	975	22	980	120	1021	30	85	25	0.294118	975	22
M1_CP088_79	2.429	0.083	0.2154	0.0058	0.0824	0.0013	0.0609	0.0077	1250	24	1257	31	1190	150	1246	30	55	24	0.436364	1257	31
M1_CP088_80	1.662	0.041	0.1657	0.0039	0.0729	0.00034	0.0508	0.0063	994	16	988	22	1000	120	1010	9.8	734	222	0.302452	988	22
M1_CP088_81	2.711	0.07	0.2225	0.0052	0.0887	0.001	0.0711	0.009	1330	20	1295	27	1390	170	1394	22	128	51	0.398438	1295	27
M1_CP088_82	2.452	0.064	0.2139	0.0051	0.08352	0.00076	0.0616	0.0077	1257	19	1249	27	1210	150	1278	18	165	76	0.460606	1249	27
M1_CP088_83	2.658	0.075	0.2294	0.0055	0.0842	0.0013	0.065	0.0081	1314	22	1331	29	1270	150	1287	29	48	26	0.541667	1331	29
M1_CP088_84	0.145	0.017	0.02081	0.00089	0.0502	0.004	0.0061	0.0015	136	14	132.8	5.6	124	29	140	140	21	18	0.857143	132.8	5.6
M1_CP088_85	1.617	0.07	0.1386	0.0054	0.0824	0.001	0.0506	0.0071	976	21	837	29	1000	140	1250	25	107	34	0.317757	837	29
M1_CP088_86	1.717	0.047	0.1713	0.0041	0.073	0.001	0.0513	0.0062	1014	18	1019	22	1010	120	1007	28	97	72	0.742268	1019	22
M1_CP088_87	1.609	0.04	0.1598	0.0038	0.07312	0.00046	0.0523	0.0061	973	15	955	21	1030	120	1015	13	274	152	0.554745	955	21
M1_CP088_88	1.61	0.042	0.1533	0.0039	0.07665	0.00044	0.046	0.0051	974	17	919	22	908	98	1111	11	782	265	0.338875	919	22
M1_CP088_89	1.194	0.035	0.1156	0.0029	0.07393	0.00064	0.0409	0.0063	797	16	705	17	810	120	1038	17	326	195	0.59816	705	17
M1_CP088_90	1.718	0.048	0.1723	0.004	0.0726	0.0012	0.0523	0.0069	1013	19	1026	22	1030	130	986	33	48	13	0.270833	1026	22
M1_CP088_91	0.1989	0.0056	0.02893	0.00068	0.04998	0.00073	0.0094	0.0012	184	4.9	183.8	4.3	189	25	188	32	565	89	0.157522	183.8	4.3
M1_CP088_92	1.928	0.077	0.1681	0.0055	0.0823	0.0015	0.0533	0.008	1087	22	1002	29	1050	150	1237	36	25	20	0.8	1002	29
M1_CP088_93	1.847	0.061	0.1824	0.0047	0.0736	0.0013	0.0523	0.0068	1059	22	1080	25	1030	130	1013	36	40	29	0.725	1080	25
M1_CP088_94	1.673	0.053	0.1662	0.004	0.07447	0.00094	0.0519	0.0063	996	16	991	22	1020	120	1042	23	392	406	1.03571	991	22
M1_CP088_95	1.754	0.046	0.1741	0.0041	0.07339	0.00087	0.0517	0.0063	1027	17	1036	22	1020	120	1021	24	103	94	0.912621	1036	22
M1_CP088_96	0.2083	0.009	0.03022	0.00073	0.0501	0.0019	0.009	0.0012	191.5	7.7	191.9	4.6	181	25	198	74	74	80	1.08108	191.9	4.6
M1_CP088_97	1.976	0.052	0.1881	0.0047	0.07666	0.0005	0.0534	0.0066	1106	18	1111	26	1050	130	1110	13	360	98	0.272222	1111	26
M1_CP088_98	1.721	0.044	0.1707	0.0041	0.07341	0.00065	0.0524	0.0065	1016	16	1016	22	1030	120	1022	18	213	84	0.394366	1016	22
M1_CP088_99	2.76	0.1	0.2347	0.0072	0.0856	0.001	0.0739	0.0088	1347	25	1359	37	1440	160	1321	22	86	46	0.534884	1359	37
M1_CP088_100	0.1445	0.0092	0.02079	0.00074	0.0495	0.0019	0.0075	0.0011	136.5	7.7	132.7	4.6	151	23	178	78	73	144	1.9726	132.7	4.6
M1_CP088_101	1.285	0.062	0.1209	0.0044	0.0753	0.0019	0.0413	0.0068	835	23	736	24	820	130	1042	53	22	16	0.727273	736	24
M1_CP088_102	2.316	0.084	0.2011	0.0064	0.08409	0.00061	0.0677	0.0089	1216	24	1181	34	1320	170	1293	14	304	67	0.220395	1181	34
M1_CP088_103	1.655	0.045	0.166	0.004	0.07253	0.00069	0.0516	0.0063	991	17	990	22	1020	120	997	19	221	138	0.624434	990	22
M1_CP088_104	2.716	0.068	0.2301	0.0054	0.08615	0.00052	0.0701	0.0085	1332	18	1335	28	1370	160	1341	12	281	93	0.330961	1335	28
M1_CP088_105	1.869	0.05	0.1805	0.0042	0.0757	0.001	0.0569	0.0071	1070	18	1069	23	1120	130	1083	27	98	47	0.479592	1069	23
M1_CP088_106	1.729	0.045	0.1721	0.004	0.07325	0.00075	0.0516	0.0063	1019	16	1024	22	1020	120	1016	21	138	74	0.536232	1024	22
M1_CP088_107	1.973	0.062	0.1966	0.0044	0.0734	0.0018	0.0516	0.007	1100	23	1156	24	1010	130	989	53	19	14	0.736842	1156	24
M1_CP088_108	1.66	0.043	0.1669	0.0039	0.0725	0.00066	0.0515	0.0062	993	16	995	22	1020	120	998	19	246	227	0.922764	995	22
M1_CP088_109	2.342	0.064	0.2155	0.0049	0.079	0.0013	0.0612	0.0076	1222	20	1258	27	1200	150	1159	32	42	19	0.452381	1258	27
M1_CP088_110	1.378	0.059	0.1391	0.0043	0.0709	0.0019	0.041	0.007	874	23	839	24	810	130	916	54	19	8	0.421053	839	24
M1_CP088_111	1.694	0.05	0.1703	0.004	0.0725	0.0012	0.0547	0.0075	1004	20	1014	22	1070	140	992	32	69	15	0.217391	1014	22
M1_CP088_112	1.841	0.047	0.1775	0.0042	0.07591	0.00047	0.0578	0.0073	1060	16	1053	23	1140	140	1091	12	429	148	0.344988	1053	23
M1_CP088_113	2.591	0.064	0.2211	0.0052	0.08546	0.00052	0.0679	0.0081	1298	19	1287	27	1330	150	1328	12	336	185	0.550595	1287	27
M1_CP088_114	1.822	0.057	0.1798	0.0049	0.0741	0.0011	0.0513	0.0064	1050	20	1066	27	1010	120	1043	29	57	74	1.29825	1066	27
M1_CP088_115	0.213	0.01	0.02948	0.00073	0.0529	0.0022	0.009	0.0013	195.3	8.4	187.3	4.6	180	27	283	84	69	34	0.492754	187.3	4.6
M1_CP088_116	2.68	0.07	0.2283	0.0054	0.08575	0.00086	0.0667	0.0082	1323	19	1325	28	1310	150	1328	20	116	74	0.637931	1325	28
M1_CP088_117	1.666	0.043	0.165	0.0039	0.07349	0.00065	0.0532	0.0062	995	16	984	22	1050	120	1028	17	211	211	1	984	22
M1_CP088_118	1.667	0.043	0.1672	0.0039	0.07277	0.00079	0.0496	0.0065	995	17	997	22	980	130	1005	22	137	15	0.109489	997	22
M1_CP088_119	2.7	0.067	0.2279	0.0054	0.08649	0.00041	0.0712	0.0085	1328	18	1324	28	1390	160	1348.1	9	461	136	0.295011	1324	28
M1_CP088_120	2.387	0.061	0.2105	0.005	0.08274	0.0006	0.0633	0.0077	1238	19	1231	27	1240	150	1261	14	214	84	0.392523	1231	27
M1_CP088_121	1.927	0.052	0.1823	0.0044	0.07719	0.0008	0.0552	0.0067	1090	18	1080	24	1090	130	1122	20	186	88	0.473118	1080	24
M1_CP088_122	1.88	0.052	0.1906	0.0049	0.07222	0.00072	0.0561	0.0068	1072	19	1124	27	1100	130	985	20	110	31	0.281818	1124	27
M1_CP088_123	2.622	0.069	0.2265	0.0055	0.08398	0.00049	0.0717	0.0082	1306	20	1318	29	1400	150	1291	11	389	231	0.59383	1318	29
M1_CP088_124	2.687	0.07	0.2295	0.0056	0.08531	0.00066	0.0705	0.0088	1324	19	1332	29	1380	170	1320	15	142	54	0.380282	1332	29
M1_CP088_125	1.732	0.046	0.1729	0.004	0.07324	0.00078	0.0521	0.0064	1019	17	1028	22	1030	120	1015	22	103	44	0.427184	1028	22
M1_CP088_126	1.774	0.046	0.1743	0.0041	0.07417	0.00065	0.0553	0.0067	1035	17	1036	23	1090	130	1042	18	190	85	0.447368	1036	23
CVI-1302
M1_CVI1302_1	0.339	0.019	0.0497	0.0012	0.0491	0.0028	0.0129	0.0019	292	14	312.4	7.5	259	39	160	110	22	19	0.863636	312.4	7.5
M1_CVI1302_2	0.321	0.013	0.0439	0.0011	0.0526	0.0018	0.0128	0.0018	281.3	9.9	277	6.5	256	36	290	69	52	42	0.807692	277	6.5
M1_CVI1302_3	0.306	0.011	0.0432	0.001	0.0514	0.0015	0.0129	0.0017	270.9	8.3	272.3	6.5	260	34	240	60	90	56	0.622222	272.3	6.5
M1_CVI1302_4	0.313	0.013	0.0439	0.0011	0.0517	0.0019	0.013	0.0017	275	10	276.7	6.7	260	35	244	73	51	38	0.745098	276.7	6.7
M1_CVI1302_5	0.3	0.013	0.0431	0.0011	0.0503	0.0019	0.0123	0.0017	265	10	272	6.6	248	33	185	72	56	38	0.678571	272	6.6
M1_CVI1302_6	0.337	0.016	0.0443	0.0011	0.0549	0.0024	0.0161	0.0058	294	12	279.7	6.6	320	110	373	81	58	5	0.0862069	279.7	6.6
M1_CVI1302_7	0.222	0.016	0.0324	0.0011	0.0487	0.0025	0.0111	0.0019	203	13	205.3	7	223	38	114	95	29	25	0.862069	205.3	7
M1_CVI1302_8	0.309	0.014	0.0435	0.0011	0.0513	0.002	0.0132	0.0018	272	11	274.7	6.6	264	36	241	81	51	36	0.705882	274.7	6.6
M1_CVI1302_9	0.305	0.015	0.0448	0.0011	0.0495	0.0023	0.0123	0.0019	268	12	282.3	6.8	247	37	141	88	36	25	0.694444	282.3	6.8
M1_CVI1302_10	0.304	0.013	0.0435	0.0011	0.0505	0.0019	0.0133	0.0018	268	11	274.3	6.6	267	35	203	77	73	47	0.643836	274.3	6.6
M1_CVI1302_11	0.321	0.018	0.0451	0.0011	0.0516	0.0028	0.0131	0.0018	279	14	284.4	7	263	36	230	100	30	36	1.2	284.4	7
M1_CVI1302_12	0.306	0.013	0.0436	0.0011	0.0507	0.0019	0.0125	0.0016	271	10	275	6.6	251	33	205	74	55	61	1.10909	275	6.6
M1_CVI1302_13	0.316	0.015	0.0447	0.0011	0.0511	0.0022	0.0134	0.0018	277	12	281.9	6.8	269	36	236	89	41	33	0.804878	281.9	6.8
M1_CVI1302_14	0.312	0.013	0.0434	0.0011	0.0519	0.0019	0.0126	0.0019	276	10	273.6	6.8	253	37	256	75	52	36	0.692308	273.6	6.8
M1_CVI1302_15	0.239	0.025	0.0324	0.0012	0.0518	0.0038	0.0117	0.0022	213	19	205.6	7.7	234	44	220	140	18	16	0.888889	205.6	7.7
M1_CVI1302_16	0.289	0.011	0.03997	0.00098	0.0522	0.0014	0.0122	0.0018	257.9	8.6	252.7	6.1	244	35	282	59	97	32	0.329897	252.7	6.1
M1_CVI1302_17	0.305	0.014	0.0432	0.0011	0.051	0.0021	0.0125	0.0018	268	11	272.5	6.6	254	37	223	82	47	31	0.659574	272.5	6.6
M1_CVI1302_18	0.328	0.014	0.0451	0.0011	0.0524	0.0019	0.0142	0.002	287	11	284.4	7	284	39	281	76	69	40	0.57971	284.4	7
M1_CVI1302_19	0.253	0.02	0.032	0.0013	0.056	0.003	0.0104	0.002	226	15	203.2	7.8	208	39	370	110	24	28	1.16667	203.2	7.8
M1_CVI1302_20	0.313	0.016	0.0433	0.0011	0.0528	0.0027	0.0135	0.0019	274	13	273	6.9	271	38	273	99	42	32	0.761905	273	6.9
M1_CVI1302_21	0.2963	0.0097	0.0418	0.001	0.0512	0.0012	0.0126	0.0016	263	7.6	263.9	6.2	252	33	239	49	165	74	0.448485	263.9	6.2
M1_CVI1302_22	0.226	0.017	0.0319	0.0012	0.0504	0.0027	0.0098	0.0018	205	13	202.2	7.2	197	36	180	100	24	21	0.875	202.2	7.2
M1_CVI1302_23	0.317	0.016	0.0443	0.0011	0.0517	0.0024	0.0124	0.0018	277	13	279.4	6.9	249	35	231	89	36	28	0.777778	279.4	6.9
M1_CVI1302_24	0.227	0.022	0.0315	0.0012	0.051	0.0035	0.0103	0.002	204	17	200.2	7.2	206	39	170	120	19	17	0.894737	200.2	7.2
M1_CVI1302_25	0.311	0.013	0.0443	0.0011	0.0508	0.0019	0.013	0.0018	273	11	279.5	6.9	260	36	207	75	48	38	0.791667	279.5	6.9
M1_CVI1302_26	0.32	0.016	0.0437	0.0011	0.0531	0.0024	0.0141	0.002	280	12	275.6	6.8	282	39	295	91	36	33	0.916667	275.6	6.8
M1_CVI1302_27	0.442	0.031	0.032	0.0011	0.099	0.0046	0.0158	0.0026	368	20	203	7	317	51	1519	91	29	36	1.24138	203	7
M1_CVI1302_28	0.3	0.011	0.0429	0.001	0.0508	0.0015	0.014	0.0025	265.6	8.8	270.6	6.4	280	49	224	61	81	11	0.135802	270.6	6.4
M1_CVI1302_29	0.316	0.016	0.0441	0.0011	0.0519	0.0024	0.0137	0.0019	276	12	278.1	6.9	277	38	238	91	53	38	0.716981	278.1	6.9
M1_CVI1302_30	0.217	0.019	0.0319	0.0011	0.0494	0.0031	0.0101	0.0018	199	15	202.2	7	205	37	120	110	23	22	0.956522	202.2	7
M1_CVI1302_31	0.313	0.013	0.0437	0.0011	0.0519	0.002	0.0131	0.0018	275	11	275.6	6.6	263	36	254	77	55	33	0.6	275.6	6.6
M1_CVI1302_32	0.318	0.014	0.0434	0.0011	0.0531	0.002	0.0131	0.0018	280	10	274.1	6.6	264	36	316	76	57	39	0.684211	274.1	6.6
M1_CVI1302_33	0.312	0.017	0.0437	0.0011	0.0512	0.0025	0.0127	0.0019	273	13	275.9	6.8	254	38	225	96	33	25	0.757576	275.9	6.8
M1_CVI1302_34	0.298	0.012	0.0427	0.001	0.0506	0.0018	0.0129	0.0018	263.9	9.6	269.5	6.4	260	35	209	70	62	32	0.516129	269.5	6.4
M1_CVI1302_35	0.312	0.019	0.0446	0.0012	0.0508	0.0028	0.0138	0.0021	273	15	281.1	7.1	280	42	210	110	25	24	0.96	281.1	7.1
M1_CVI1302_36	0.227	0.019	0.0324	0.0012	0.05	0.003	0.01	0.0019	205	15	205.2	7.2	204	38	170	110	20	19	0.95	205.2	7.2
M1_CVI1302_37	0.21	0.018	0.0296	0.0012	0.0498	0.0026	0.0111	0.0021	192	14	188.2	7.1	222	42	159	96	27	28	1.03704	188.2	7.1
M1_CVI1302_38	0.314	0.017	0.0441	0.0011	0.0512	0.0024	0.0132	0.0019	275	13	277.9	6.9	265	39	234	94	38	30	0.789474	277.9	6.9
M1_CVI1302_39	0.228	0.018	0.0318	0.0011	0.0511	0.0029	0.0102	0.0019	206	14	201.6	7	205	38	200	110	22	21	0.954545	201.6	7
M1_CVI1302_40	0.31	0.014	0.0437	0.0011	0.0515	0.0019	0.0129	0.0018	273	10	275.4	6.6	259	35	234	74	57	35	0.614035	275.4	6.6
M1_CVI1302_41	0.307	0.013	0.0424	0.001	0.0527	0.0018	0.0117	0.0017	271	10	267.8	6.5	234	33	286	71	80	49	0.6125	267.8	6.5
M1_CVI1302_42	0.225	0.019	0.0321	0.0012	0.05	0.0031	0.0113	0.0019	204	15	203.8	7.2	226	38	160	110	27	30	1.11111	203.8	7.2
M1_CVI1302_43	0.305	0.013	0.043	0.001	0.0516	0.0019	0.0133	0.0019	269	10	271.5	6.4	267	38	236	74	49	28	0.571429	271.5	6.4
M1_CVI1302_44	0.297	0.011	0.0425	0.001	0.0507	0.0014	0.0131	0.0017	263.3	8.4	268.3	6.3	263	34	220	57	127	75	0.590551	268.3	6.3
M1_CVI1302_45	0.306	0.013	0.0436	0.0011	0.051	0.0018	0.014	0.0018	271	10	275.3	6.7	280	36	226	72	58	49	0.844828	275.3	6.7
M1_CVI1302_46	0.22	0.018	0.0316	0.0011	0.0507	0.0029	0.0101	0.0017	202	14	200.5	6.9	204	34	190	110	26	32	1.23077	200.5	6.9
M1_CVI1302_47	0.301	0.013	0.0427	0.0011	0.0513	0.0019	0.0132	0.0018	266	10	269.3	6.5	265	37	233	77	47	36	0.765957	269.3	6.5
M1_CVI1302_48	0.307	0.014	0.0438	0.0011	0.051	0.0021	0.0133	0.0018	270	11	276.4	6.8	267	36	213	82	46	41	0.891304	276.4	6.8
M1_CVI1302_49	0.303	0.013	0.0432	0.0011	0.0513	0.0018	0.0126	0.0017	268	10	272.5	6.6	253	34	235	73	57	43	0.754386	272.5	6.6
CVI-13115
M1_CVI13115_1	0.115	0.032	0.0198	0.0011	0.039	0.0084	0.0052	0.0027	101	27	126.1	7	104	53	-380	270	6	5	0.833333	126.1	7
M1_CVI13115_2	0.1993	0.0073	0.02948	0.00072	0.0492	0.0014	0.0092	0.0012	184.2	6.1	187.3	4.5	184	24	149	56	149	70	0.469799	187.3	4.5
M1_CVI13115_3	0.128	0.017	0.02035	0.00082	0.0445	0.004	0.007	0.0013	120	14	129.9	5.1	141	26	-40	150	22	27	1.22727	129.9	5.1
M1_CVI13115_4	0.131	0.018	0.01824	0.00085	0.05	0.0046	0.0067	0.0014	122	15	116.5	5.3	135	28	130	160	13	13	1	116.5	5.3
M1_CVI13115_5	0.1992	0.0071	0.02869	0.0007	0.0507	0.0013	0.0094	0.0012	185.4	6	182.3	4.4	190	25	222	57	176	77	0.4375	182.3	4.4
M1_CVI13115_6	0.1978	0.0093	0.02941	0.00074	0.049	0.002	0.0088	0.0013	182.3	7.8	186.8	4.6	178	26	138	80	80	40	0.5	186.8	4.6
M1_CVI13115_7	2.172	0.054	0.1997	0.0047	0.07905	0.00045	0.0613	0.0073	1172	17	1173	25	1200	140	1172	11	387	135	0.348837	1173	25
M1_CVI13115_8	2.04	0.054	0.1929	0.0047	0.07712	0.00052	0.057	0.0071	1128	18	1137	25	1120	140	1122	13	303	136	0.448845	1137	25
M1_CVI13115_9	1.805	0.046	0.1732	0.004	0.07606	0.00057	0.0526	0.0067	1047	16	1030	22	1040	130	1094	15	348	45	0.12931	1030	22
M1_CVI13115_10	2.175	0.061	0.2	0.0049	0.0792	0.001	0.0576	0.0075	1173	19	1175	26	1140	140	1176	26	90	46	0.511111	1175	26
M1_CVI13115_11	1.47	0.045	0.142	0.0041	0.0753	0.00062	0.0505	0.0059	917	20	856	24	990	110	1073	17	298	52	0.174497	856	24
M1_CVI13115_12	0.206	0.012	0.03	0.00076	0.0498	0.0026	0.0093	0.0015	189.6	9.8	190.6	4.7	186	29	166	99	50	29	0.58	190.6	4.7
M1_CVI13115_13	1.629	0.042	0.1643	0.0038	0.07212	0.00069	0.0501	0.006	982	16	980	21	990	120	990	18	173	73	0.421965	980	21
M1_CVI13115_14	0.143	0.014	0.02122	0.00082	0.0472	0.0031	0.0072	0.0013	134	12	135.3	5.1	146	26	70	120	28	29	1.03571	135.3	5.1
M1_CVI13115_15	0.2045	0.0068	0.03007	0.00075	0.0495	0.001	0.009	0.0013	188.8	5.7	191	4.7	181	25	167	43	548	105	0.191606	191	4.7
M1_CVI13115_16	0.145	0.012	0.02126	0.00075	0.0486	0.0028	0.0079	0.0013	136	10	135.6	4.7	158	27	120	100	94	115	1.2234	135.6	4.7
M1_CVI13115_17	0.1882	0.0073	0.0277	0.00067	0.0491	0.0014	0.0087	0.0012	174.7	6.2	176.2	4.2	176	23	160	60	163	89	0.546012	176.2	4.2
M1_CVI13115_18	1.695	0.044	0.1702	0.004	0.07234	0.00069	0.0522	0.0065	1007	16	1013	22	1030	120	994	19	204	65	0.318627	1013	22
M1_CVI13115_19	1.473	0.044	0.1444	0.0041	0.07393	0.00046	0.0431	0.0057	921	17	870	23	850	110	1037	12	479	64	0.133612	870	23
M1_CVI13115_20	0.14	0.015	0.02141	0.00087	0.0465	0.0036	0.0074	0.0015	131	13	136.6	5.5	148	31	40	130	22	22	1	136.6	5.5
M1_CVI13115_21	0.21	0.011	0.02951	0.00075	0.0514	0.0023	0.0093	0.0014	191.9	9.1	187.4	4.7	187	29	248	93	59	26	0.440678	187.4	4.7
M1_CVI13115_22	1.684	0.046	0.1674	0.004	0.07315	0.00094	0.0516	0.0063	1001	17	998	22	1020	120	1010	26	84	58	0.690476	998	22
M1_CVI13115_23	1.643	0.044	0.1654	0.0039	0.07204	0.00091	0.0483	0.0062	985	17	986	22	950	120	979	26	101	18	0.178218	986	22
M1_CVI13115_24	1.669	0.042	0.1667	0.0039	0.07287	0.00046	0.0527	0.0063	996	16	994	22	1040	120	1008	13	448	131	0.292411	994	22
M1_CVI13115_25	1.265	0.063	0.1256	0.0055	0.0716	0.0014	0.0447	0.006	829	27	763	32	880	110	966	40	75	39	0.52	763	32
M1_CVI13115_26	2.063	0.054	0.1936	0.0046	0.07742	0.00085	0.0585	0.0071	1135	18	1141	25	1150	140	1129	21	112	63	0.5625	1141	25
M1_CVI13115_27	1.83	0.077	0.1806	0.0068	0.0741	0.0012	0.0584	0.0093	1054	25	1070	37	1140	170	1035	32	91	12	0.131868	1070	37
M1_CVI13115_28	2.696	0.066	0.2281	0.0053	0.08615	0.00047	0.0683	0.0081	1327	18	1324	28	1340	150	1342	10	343	154	0.44898	1324	28
M1_CVI13115_29	1.833	0.048	0.1711	0.0041	0.07785	0.00063	0.0518	0.0066	1056	17	1018	23	1020	130	1140	17	196	23	0.117347	1018	23
M1_CVI13115_30	1.91	0.053	0.1744	0.0043	0.0799	0.0011	0.0589	0.0072	1083	19	1036	23	1160	140	1187	27	90	67	0.744444	1036	23
M1_CVI13115_31	1.695	0.045	0.1707	0.004	0.07237	0.00084	0.0521	0.0064	1006	17	1016	22	1030	120	989	24	146	46	0.315068	1016	22
M1_CVI13115_32	0.1965	0.0074	0.02846	0.0007	0.0502	0.0015	0.0081	0.0011	181.7	6.3	180.9	4.4	163	22	197	61	153	49	0.320261	180.9	4.4
M1_CVI13115_33	1.645	0.044	0.1657	0.0039	0.07232	0.00087	0.0513	0.0062	987	17	988	22	1010	120	991	25	103	65	0.631068	988	22
M1_CVI13115_34	1.799	0.046	0.1733	0.0041	0.07575	0.00075	0.0594	0.0073	1044	17	1030	22	1170	140	1087	20	174	55	0.316092	1030	22
M1_CVI13115_35	1.771	0.047	0.1721	0.0042	0.07501	0.00067	0.0567	0.0068	1034	17	1023	23	1110	130	1065	17	279	115	0.412186	1023	23
M1_CVI13115_36	0.212	0.016	0.03044	0.00086	0.0512	0.0037	0.0094	0.0018	193	13	193.3	5.4	188	36	190	130	32	22	0.6875	193.3	5.4
M1_CVI13115_37	1.753	0.049	0.1741	0.0042	0.0734	0.0011	0.0548	0.0071	1028	18	1034	23	1080	140	1023	29	70	23	0.328571	1034	23
M1_CVI13115_38	0.166	0.018	0.02178	0.0009	0.0548	0.0041	0.0078	0.0018	154	15	138.9	5.6	156	35	280	140	16	15	0.9375	138.9	5.6
M1_CVI13115_39	1.13	0.049	0.1091	0.0043	0.07333	0.00097	0.0437	0.0074	767	18	667	24	860	150	1020	28	118	18	0.152542	667	24
M1_CVI13115_40	1.909	0.052	0.1804	0.0047	0.07747	0.00051	0.0528	0.0064	1083	18	1069	26	1040	120	1133	13	468	100	0.213675	1069	26
M1_CVI13115_41	2.305	0.058	0.2113	0.005	0.07983	0.00057	0.0559	0.0067	1213	18	1236	27	1100	130	1191	14	212	126	0.59434	1236	27
M1_CVI13115_42	0.142	0.021	0.01942	0.00085	0.054	0.0052	0.0063	0.0016	133	17	124	5.3	127	32	270	160	26	23	0.884615	124	5.3
M1_CVI13115_43	0.1963	0.0058	0.02851	0.00068	0.05016	0.00086	0.0095	0.0011	181.9	4.9	181.2	4.2	191	23	196	37	379	372	0.98153	181.2	4.2
M1_CVI13115_44	1.435	0.05	0.1465	0.0046	0.0712	0.0012	0.039	0.0042	902	24	881	27	772	83	950	37	74	25	0.337838	881	27
M1_CVI13115_45	1.685	0.046	0.1691	0.004	0.07252	0.00091	0.0536	0.0066	1001	18	1007	22	1050	130	993	26	98	45	0.459184	1007	22
M1_CVI13115_46	0.15	0.019	0.02092	0.00085	0.0514	0.0049	0.0076	0.0018	139	16	133.4	5.3	152	36	130	160	15	13	0.866667	133.4	5.3
M1_CVI13115_47	1.75	0.046	0.1758	0.0042	0.07274	0.00071	0.053	0.0066	1026	17	1044	23	1040	130	1002	20	173	68	0.393064	1044	23
M1_CVI13115_48	1.233	0.065	0.1219	0.0044	0.0725	0.0021	0.0375	0.0085	811	25	741	25	740	160	959	64	23	4	0.173913	741	25
M1_CVI13115_49	1.648	0.044	0.1655	0.0039	0.07262	0.00083	0.0507	0.0062	988	17	987	21	1000	120	997	23	133	35	0.263158	987	21
M1_CVI13115_50	2.123	0.057	0.2012	0.005	0.07681	0.00045	0.0643	0.0074	1157	19	1182	27	1260	140	1115	12	348	56	0.16092	1182	27
M1_CVI13115_51	1.751	0.046	0.1738	0.0042	0.07316	0.00077	0.0525	0.0064	1026	17	1033	23	1030	120	1012	21	120	39	0.325	1033	23
M1_CVI13115_52	1.99	0.055	0.184	0.0044	0.0789	0.0011	0.0566	0.007	1111	19	1089	24	1110	130	1162	28	83	84	1.01205	1089	24
M1_CVI13115_53	1.764	0.048	0.1739	0.0043	0.07368	0.00073	0.0529	0.0064	1031	17	1033	24	1040	120	1028	20	178	60	0.337079	1033	24
M1_CVI13115_54	0.139	0.018	0.02141	0.00085	0.0465	0.0043	0.0066	0.0015	133	15	136.6	5.3	133	30	20	160	17	15	0.882353	136.6	5.3
CVI-1302
M2_CVI1302_1	1.038	0.037	0.0946	0.0033	0.07938	0.00062	0.0483	0.0059	722	17	582	19	950	110	1178	15	527	121	0.229602	582	19
M2_CVI1302_2	0.545	0.015	0.0544	0.0013	0.07278	0.0007	0.023	0.0025	441	10	341.2	8.2	460	49	1003	21	1286	528	0.410575	341.2	8.2
M2_CVI1302_3	1.135	0.04	0.0965	0.0038	0.08484	0.00069	0.0311	0.0043	772	18	594	22	619	84	1309	17	200	124	0.62	594	22
M2_CVI1302_4	1.816	0.052	0.1706	0.004	0.077	0.0013	0.0536	0.0064	1049	19	1016	22	1050	120	1106	35	58	40	0.689655	1016	22
M2_CVI1302_5	2.557	0.068	0.2155	0.0054	0.08613	0.00059	0.0687	0.0082	1288	19	1258	28	1340	150	1339	14	195	88	0.451282	1258	28
M2_CVI1302_6	1.32	0.039	0.1257	0.0036	0.07565	0.00042	0.0397	0.0052	854	16	763	21	790	100	1084	11	519	32	0.061657	763	21
M2_CVI1302_7	2.269	0.062	0.2019	0.0052	0.08148	0.00054	0.0596	0.0071	1201	19	1185	28	1170	140	1231	13	282	154	0.546099	1185	28
M2_CVI1302_8	1.714	0.045	0.1699	0.004	0.0729	0.00083	0.0506	0.006	1013	17	1012	22	1000	120	1005	23	87	72	0.827586	1012	22
M2_CVI1302_9	1.688	0.044	0.1685	0.004	0.0727	0.00084	0.0499	0.006	1003	18	1003	22	980	110	1000	23	103	78	0.757282	1003	22
M2_CVI1302_10	2.686	0.069	0.2269	0.0054	0.08566	0.00068	0.0666	0.0078	1323	19	1318	28	1300	150	1328	15	181	84	0.464088	1318	28
M2_CVI1302_11	1.743	0.047	0.1716	0.0041	0.0736	0.001	0.0488	0.0059	1023	18	1021	22	960	110	1020	29	81	41	0.506173	1021	22
M2_CVI1302_12	2.59	0.066	0.2224	0.0052	0.08431	0.00066	0.0646	0.0077	1297	19	1294	27	1260	150	1297	15	151	55	0.364238	1294	27
M2_CVI1302_13	1.704	0.046	0.1706	0.004	0.07219	0.00097	0.0484	0.0059	1009	17	1015	22	950	110	987	28	77	59	0.766234	1015	22
M2_CVI1302_14	2.27	0.056	0.2015	0.0048	0.08131	0.0005	0.0649	0.0072	1202	18	1183	26	1270	140	1227	12	266	130	0.488722	1183	26
M2_CVI1302_15	1.756	0.047	0.1726	0.0041	0.07364	0.00095	0.0517	0.0062	1028	17	1026	23	1020	120	1025	26	89	59	0.662921	1026	23
M2_CVI1302_16	2.202	0.071	0.2009	0.0059	0.07904	0.00072	0.0572	0.0066	1180	25	1180	33	1120	130	1169	19	123	47	0.382114	1180	33
M2_CVI1302_17	2.164	0.053	0.1962	0.0046	0.07953	0.00045	0.0612	0.007	1170	17	1155	25	1200	130	1186	12	376	190	0.505319	1155	25
M2_CVI1302_18	2.568	0.064	0.2224	0.0052	0.08358	0.00047	0.0698	0.0081	1291	18	1295	27	1360	150	1283	11	275	103	0.374545	1295	27
M2_CVI1302_19	1.912	0.056	0.1848	0.0042	0.0747	0.0014	0.0525	0.0064	1081	20	1093	23	1030	120	1045	36	46	29	0.630435	1093	23
M2_CVI1302_20	1.719	0.047	0.1694	0.004	0.0737	0.001	0.0488	0.0059	1017	18	1009	22	970	110	1026	29	97	43	0.443299	1009	22
M2_CVI1302_21	1.696	0.044	0.1669	0.004	0.07345	0.00052	0.0548	0.0063	1006	17	995	22	1080	120	1024	14	302	181	0.599338	995	22
M2_CVI1302_22	1.735	0.046	0.1743	0.0041	0.07219	0.00098	0.0476	0.0059	1020	18	1035	23	940	110	983	27	86	71	0.825581	1035	23
M2_CVI1302_23	1.941	0.057	0.1774	0.0048	0.07948	0.00051	0.054	0.0068	1095	19	1053	26	1060	130	1183	13	418	170	0.406699	1053	26
M2_CVI1302_24	1.733	0.045	0.1748	0.004	0.07199	0.00082	0.0496	0.0058	1021	17	1038	22	980	110	979	23	87	73	0.83908	1038	22
M2_CVI1302_25	2.519	0.066	0.2206	0.0053	0.08248	0.00059	0.0669	0.0077	1277	20	1285	28	1310	150	1254	14	148	63	0.425676	1285	28
M2_CVI1302_26	2.572	0.066	0.2239	0.0054	0.083	0.00051	0.0665	0.0077	1292	19	1302	29	1300	150	1267	12	227	91	0.400881	1302	29
M2_CVI1302_27	1.704	0.044	0.1706	0.0039	0.07217	0.00079	0.0498	0.006	1009	16	1015	21	980	120	985	23	105	67	0.638095	1015	21
M2_CVI1302_28	2.145	0.056	0.2009	0.0046	0.07697	0.00098	0.0534	0.0064	1162	19	1180	25	1050	120	1112	26	51	31	0.607843	1180	25
M2_CVI1302_29	1.051	0.028	0.1058	0.0028	0.07196	0.00036	0.0387	0.0044	728	14	648	16	767	86	984	10	1070	157	0.146729	648	16
M2_CVI1302_30	2.036	0.057	0.1825	0.0043	0.08086	0.00098	0.0581	0.0076	1127	19	1081	24	1140	150	1215	23	128	46	0.359375	1081	24
M2_CVI1302_31	2.701	0.095	0.2259	0.0065	0.086	0.0012	0.083	0.012	1327	29	1313	35	1620	210	1334	25	155	34	0.219355	1313	35
M2_CVI1302_32	1.49	0.041	0.1381	0.0037	0.07783	0.00041	0.044	0.0051	926	17	834	21	870	100	1141	11	530	231	0.435849	834	21
M2_CVI1302_33	1.754	0.045	0.1747	0.004	0.07246	0.0009	0.0518	0.0062	1028	17	1038	22	1020	120	995	24	86	69	0.802326	1038	22
M2_CVI1302_34	1.76	0.046	0.1741	0.004	0.07319	0.00099	0.0506	0.0062	1031	17	1035	22	1000	120	1011	28	82	59	0.719512	1035	22
M2_CVI1302_35	1.753	0.046	0.1733	0.004	0.07309	0.00082	0.052	0.0064	1028	17	1030	22	1020	120	1010	23	114	47	0.412281	1030	22
M2_CVI1302_36	1.74	0.047	0.1744	0.004	0.0718	0.00098	0.0506	0.006	1021	18	1036	22	1000	120	970	28	72	57	0.791667	1036	22
M2_CVI1302_37	1.774	0.047	0.1757	0.0041	0.07278	0.00091	0.0533	0.0064	1034	17	1043	22	1050	120	999	26	90	48	0.533333	1043	22
M2_CVI1302_38	2.185	0.055	0.2002	0.0046	0.07851	0.00086	0.0598	0.0071	1175	18	1176	25	1170	140	1154	22	98	49	0.5	1176	25
M2_CVI1302_39	2.786	0.072	0.2328	0.0056	0.08641	0.0007	0.0716	0.0085	1351	19	1349	29	1400	160	1345	16	181	84	0.464088	1349	29
M2_CVI1302_40	1.664	0.042	0.1677	0.0038	0.07184	0.00078	0.0489	0.0056	994	17	999	21	960	110	976	22	134	84	0.626866	999	21
M2_CVI1302_41	2.538	0.08	0.2234	0.0063	0.08237	0.00073	0.0689	0.008	1282	26	1299	34	1350	150	1252	18	243	72	0.296296	1299	34
M2_CVI1302_42	1.744	0.053	0.1718	0.0048	0.07306	0.00067	0.0528	0.0063	1022	20	1021	26	1040	120	1012	18	143	66	0.461538	1021	26
M2_CVI1302_43	2.744	0.068	0.2365	0.0055	0.08328	0.00069	0.0671	0.0079	1340	18	1368	29	1310	150	1273	16	139	33	0.23741	1368	29
M2_CVI1302_44	2.303	0.066	0.189	0.0051	0.0876	0.00057	0.0685	0.0079	1212	20	1116	27	1340	150	1371	13	355	135	0.380282	1116	27
M2_CVI1302_45	2.529	0.064	0.2207	0.0052	0.08238	0.00051	0.0674	0.008	1280	18	1285	28	1320	150	1253	12	173	79	0.456647	1285	28
M2_CVI1302_46	1.759	0.046	0.1732	0.004	0.07301	0.00098	0.0497	0.006	1029	18	1030	22	980	120	1005	28	78	53	0.679487	1030	22
M2_CVI1302_47	0.669	0.021	0.0694	0.0021	0.06956	0.00053	0.0262	0.0028	523	14	432	13	523	55	913	16	1027	470	0.457644	432	13
M2_CVI1302_48	1.661	0.041	0.1656	0.0039	0.07255	0.00051	0.0511	0.0059	993	16	988	21	1010	110	999	15	387	162	0.418605	988	21
M2_CVI1302_49	2.579	0.064	0.2205	0.0051	0.08386	0.00055	0.0675	0.0078	1294	18	1284	27	1320	150	1287	13	177	98	0.553672	1284	27
M2_CVI1302_50	2.604	0.065	0.2207	0.0051	0.0847	0.00063	0.066	0.0079	1301	18	1285	27	1290	150	1306	14	140	63	0.45	1285	27
M2_CVI1302_51	2.092	0.052	0.1886	0.0045	0.07964	0.00045	0.0587	0.0069	1146	17	1114	24	1150	130	1187	11	385	140	0.363636	1114	24
M2_CVI1302_52	1.669	0.041	0.165	0.0039	0.07272	0.00041	0.0508	0.0059	996	16	984	21	1000	110	1005	12	449	319	0.710468	984	21
M2_CVI1302_53	2.688	0.07	0.2265	0.0055	0.08506	0.0005	0.0677	0.0078	1324	20	1316	29	1320	150	1315	11	251	101	0.40239	1316	29
M2_CVI1302_54	2.912	0.072	0.2438	0.0057	0.08579	0.00052	0.0748	0.0086	1384	19	1406	30	1460	160	1335	12	197	77	0.390863	1406	30
M2_CVI1302_55	1.742	0.049	0.175	0.004	0.0717	0.0012	0.0492	0.0059	1024	18	1040	22	970	110	969	36	41	73	1.78049	1040	22
M2_CVI1302_56	2.264	0.078	0.1981	0.006	0.0825	0.0014	0.0786	0.0084	1200	25	1165	33	1530	160	1259	31	322	180	0.559006	1165	33
M2_CVI1302_57	1.711	0.045	0.1688	0.004	0.07306	0.00092	0.0506	0.0061	1012	18	1006	22	1000	120	1013	26	93	69	0.741935	1006	22
M2_CVI1302_58	2.922	0.073	0.2455	0.0057	0.08541	0.00054	0.0769	0.0087	1387	19	1415	30	1500	160	1323	12	162	67	0.41358	1415	30
M2_CVI1302_59	1.6	0.11	0.169	0.0085	0.0685	0.0021	0.0453	0.0075	967	40	1006	47	890	140	867	63	30	17	0.566667	1006	47
M2_CVI1302_60	1.714	0.047	0.1739	0.0041	0.071	0.0012	0.0546	0.0072	1014	18	1033	22	1070	140	956	32	42	12	0.285714	1033	22
M2_CVI1302_61	1.711	0.047	0.1694	0.004	0.073	0.001	0.0505	0.0061	1011	18	1009	22	1000	120	1002	30	69	43	0.623188	1009	22
M2_CVI1302_62	1.688	0.046	0.1675	0.004	0.07262	0.00087	0.0503	0.0061	1004	17	998	22	990	120	1001	25	109	83	0.761468	998	22
M2_CVI1302_63	2.742	0.078	0.2266	0.0063	0.08722	0.00052	0.0724	0.0082	1338	23	1316	33	1410	150	1364	12	398	198	0.497487	1316	33
M2_CVI1302_64	0.934	0.031	0.0867	0.0026	0.07732	0.00066	0.0345	0.0042	669	17	536	15	685	82	1128	17	683	198	0.289898	536	15
M2_CVI1302_65	2.551	0.064	0.2184	0.0051	0.08426	0.00072	0.0684	0.0084	1286	19	1273	27	1340	160	1295	17	166	57	0.343373	1273	27
M2_CVI1302_66	1.946	0.052	0.1785	0.0044	0.07863	0.00074	0.0574	0.0072	1098	18	1059	24	1130	140	1159	19	151	53	0.350993	1059	24
M2_CVI1302_67	1.714	0.048	0.1709	0.0041	0.0723	0.0011	0.0499	0.006	1012	18	1017	22	980	120	991	30	63	45	0.714286	1017	22
M2_CVI1302_68	1.673	0.042	0.166	0.0039	0.07251	0.00043	0.0519	0.0061	998	16	990	21	1020	120	998	12	408	368	0.901961	990	21
M2_CVI1302_69	1.935	0.054	0.1778	0.0051	0.07891	0.00075	0.06	0.0071	1095	20	1055	29	1180	140	1168	18	435	135	0.310345	1055	29
M2_CVI1302_70	1.324	0.069	0.1265	0.0044	0.0743	0.0024	0.0411	0.0064	850	26	768	24	810	120	1003	68	17	27	1.58824	768	24
M2_CVI1302_71	2.943	0.077	0.2492	0.0062	0.08503	0.00052	0.0777	0.0087	1392	20	1434	32	1510	160	1315	12	245	96	0.391837	1434	32
M2_CVI1302_72	1.695	0.046	0.1684	0.004	0.07272	0.00098	0.0501	0.0061	1005	18	1003	22	990	120	1002	27	92	76	0.826087	1003	22
M2_CVI1302_73	2.026	0.054	0.1888	0.0047	0.07736	0.00061	0.0549	0.0063	1124	19	1115	26	1080	120	1128	15	238	100	0.420168	1115	26
M2_CVI1302_74	2.685	0.068	0.226	0.0054	0.08595	0.00065	0.0664	0.0079	1323	18	1313	28	1300	150	1335	15	203	106	0.522167	1313	28
M2_CVI1302_75	1.753	0.051	0.1741	0.0041	0.0727	0.0012	0.0522	0.0063	1026	19	1035	23	1030	120	997	34	78	48	0.615385	1035	23
M2_CVI1302_76	2.559	0.065	0.2182	0.0052	0.08472	0.00052	0.0658	0.0078	1289	18	1272	27	1290	150	1307	12	300	118	0.393333	1272	27
M2_CVI1302_77	0.739	0.032	0.0672	0.0028	0.07942	0.00061	0.0283	0.0036	562	18	419	17	564	70	1180	15	674	296	0.439169	419	17
M2_CVI1302_78	1.65	0.047	0.1679	0.0041	0.0712	0.001	0.0517	0.0064	990	18	1000	23	1020	120	952	29	87	40	0.45977	1000	23
M2_CVI1302_79	2.76	0.068	0.2317	0.0054	0.08609	0.00047	0.0701	0.0083	1344	18	1343	28	1370	160	1339	11	353	192	0.543909	1343	28
M2_CVI1302_80	1.75	0.049	0.1724	0.0042	0.07347	0.00094	0.0519	0.0063	1025	18	1025	23	1020	120	1019	26	92	55	0.597826	1025	23
M2_CVI1302_81	1.652	0.042	0.1591	0.0039	0.07533	0.00048	0.0496	0.0055	990	17	952	22	980	110	1076	13	478	181	0.378661	952	22
M2_CVI1302_82	1.732	0.047	0.172	0.004	0.07294	0.00098	0.0524	0.0063	1019	18	1023	22	1030	120	1004	27	78	57	0.730769	1023	22
M2_CVI1302_83	1.721	0.044	0.1714	0.0041	0.07277	0.00047	0.0542	0.0064	1016	17	1020	22	1070	120	1006	13	440	159	0.361364	1020	22
M2_CVI1302_84	1.428	0.049	0.1433	0.0046	0.07247	0.00051	0.0498	0.005	900	23	863	27	982	98	998	15	749	183	0.244326	863	27
M2_CVI1302_85	0.93	0.032	0.095	0.0032	0.07107	0.00046	0.0388	0.0047	667	16	585	19	769	92	957	13	610	132	0.216393	585	19
M2_CVI1302_86	0.592	0.024	0.0656	0.002	0.06575	0.00089	0.0368	0.0046	472	15	409	12	730	89	795	26	1471	142	0.096533	409	12
M2_CVI1302_87	1.659	0.042	0.1652	0.0038	0.07276	0.00055	0.05	0.0059	992	16	985	21	990	110	1005	15	250	131	0.524	985	21
M2_CVI1302_88	1.294	0.059	0.1327	0.0056	0.07087	0.00069	0.0454	0.0043	841	31	803	33	897	84	952	22	1419	103	0.0725863	803	33
M2_CVI1302_89	2.214	0.061	0.2003	0.005	0.08004	0.00074	0.0606	0.0073	1184	19	1177	27	1190	140	1194	19	167	67	0.401198	1177	27
M2_CVI1302_90	1.874	0.07	0.171	0.006	0.07925	0.00051	0.0534	0.0066	1071	23	1017	33	1050	130	1176	12	407	189	0.464373	1017	33
M2_CVI1302_91	1.72	0.045	0.1719	0.004	0.07254	0.00094	0.0508	0.0061	1015	17	1022	22	1000	120	993	27	73	55	0.753425	1022	22
M2_CVI1302_92	2.577	0.065	0.2203	0.0053	0.08477	0.00046	0.0694	0.0081	1293	19	1283	28	1350	150	1309	11	349	149	0.426934	1283	28
M2_CVI1302_93	2.789	0.071	0.2338	0.0055	0.08649	0.00058	0.0704	0.0084	1352	19	1354	29	1380	160	1347	13	219	76	0.347032	1354	29
M2_CVI1302_94	1.975	0.082	0.1728	0.0064	0.0827	0.001	0.047	0.0049	1107	33	1027	36	928	95	1262	25	91	46	0.505495	1027	36
M2_CVI1302_95	1.835	0.054	0.1807	0.0041	0.0733	0.0016	0.0519	0.0064	1054	20	1071	23	1020	120	1000	45	27	17	0.62963	1071	23
M2_CVI1302_96	1.247	0.037	0.1187	0.0033	0.07617	0.00044	0.0417	0.005	822	16	723	19	825	97	1098	11	609	313	0.513957	723	19
M2_CVI1302_97	1.654	0.042	0.1657	0.0039	0.07236	0.00051	0.0506	0.006	991	16	988	22	1000	110	994	14	301	113	0.375415	988	22
M2_CVI1302_98	0.883	0.031	0.0829	0.0025	0.07677	0.0008	0.0309	0.0033	642	18	514	15	614	64	1111	22	407	174	0.427518	514	15
M2_CVI1302_99	3.36	0.11	0.2456	0.0056	0.0981	0.0026	0.0847	0.0099	1479	25	1415	30	1630	180	1579	45	47	24	0.510638	1415	30
M2_CVI1302_100	2.269	0.06	0.205	0.005	0.08	0.00071	0.07	0.0082	1201	19	1202	27	1370	160	1193	18	91	38	0.417582	1202	27
M2_CVI1302_101	1.749	0.049	0.1731	0.004	0.0733	0.0012	0.0514	0.0061	1024	19	1029	22	1010	120	1014	33	68	143	2.10294	1029	22
M2_CVI1302_102	1.921	0.05	0.1848	0.0043	0.07562	0.00087	0.0556	0.0067	1087	18	1093	24	1090	130	1082	24	84	61	0.72619	1093	24
M2_CVI1302_103	3.05	0.077	0.239	0.0056	0.09268	0.00071	0.09	0.01	1419	20	1381	29	1740	200	1479	15	159	53	0.333333	1381	29
M2_CVI1302_104	1.728	0.069	0.1719	0.0049	0.07336	0.00096	0.0521	0.0067	1018	23	1022	27	1030	130	1022	24	505	235	0.465347	1022	27
M2_CVI1302_105	2.343	0.067	0.2044	0.0054	0.08348	0.00061	0.0681	0.0083	1224	21	1198	29	1330	160	1283	14	457	151	0.330416	1198	29
M2_CVI1302_106	1.724	0.047	0.1728	0.004	0.0728	0.001	0.0516	0.0062	1016	18	1027	22	1020	120	1000	28	79	58	0.734177	1027	22
M2_CVI1302_107	2.061	0.057	0.1746	0.0041	0.0859	0.0014	0.0609	0.0073	1133	20	1037	23	1190	140	1325	32	63	51	0.809524	1037	23
M2_CVI1302_108	0.956	0.027	0.0889	0.0026	0.07847	0.00083	0.0352	0.004	681	14	549	15	698	77	1156	20	711	331	0.465541	549	15
M2_CVI1302_109	1.959	0.065	0.1866	0.0043	0.0762	0.0017	0.0546	0.0069	1098	23	1103	23	1070	130	1083	45	34	28	0.823529	1103	23
M2_CVI1302_110	1.693	0.047	0.172	0.004	0.0717	0.001	0.0494	0.0061	1004	18	1023	22	970	120	970	29	80	61	0.7625	1023	22
M2_CVI1302_111	2.691	0.067	0.2286	0.0054	0.08573	0.00049	0.0694	0.0082	1325	18	1327	28	1360	160	1331	11	295	165	0.559322	1327	28
M2_CVI1302_112	0.719	0.03	0.0634	0.0019	0.0806	0.0019	0.0335	0.004	542	17	396	11	664	78	1192	45	1824	702	0.384868	396	11
M2_CVI1302_113	2.794	0.086	0.2246	0.0058	0.09005	0.00096	0.0885	0.0094	1350	24	1306	31	1710	180	1418	21	243	97	0.399177	1306	31
M2_CVI1302_114	2.725	0.084	0.2293	0.0064	0.08616	0.0007	0.069	0.0082	1334	24	1330	34	1350	160	1338	16	133	55	0.413534	1330	34
M2_CVI1302_115	1.749	0.045	0.1737	0.004	0.07353	0.00083	0.052	0.0063	1027	17	1032	23	1020	120	1026	22	97	61	0.628866	1032	23
M2_CVI1302_116	2.408	0.063	0.2114	0.005	0.08306	0.00082	0.0622	0.0075	1245	19	1236	27	1220	140	1269	18	126	58	0.460317	1236	27
M2_CVI1302_117	2.166	0.054	0.192	0.0046	0.08212	0.0004	0.0573	0.0068	1170	17	1132	25	1130	130	1247.4	9.5	588	183	0.311224	1132	25
M2_CVI1302_118	1.739	0.047	0.1767	0.004	0.0716	0.0012	0.0488	0.006	1021	18	1049	22	960	110	966	32	60	45	0.75	1049	22
M2_CVI1302_119	1.242	0.039	0.1184	0.0035	0.07463	0.00058	0.0475	0.0054	817	18	721	20	940	110	1060	16	377	196	0.519894	721	20
M2_CVI1302_120	2.07	0.051	0.1973	0.0045	0.07584	0.00077	0.0635	0.0072	1138	17	1160	25	1240	140	1085	20	103	63	0.61165	1160	25
M2_CVI1302_121	2.425	0.064	0.2113	0.0052	0.08345	0.00059	0.0631	0.0068	1249	20	1236	28	1240	130	1278	14	317	198	0.624606	1236	28
M2_CVI1302_122	2.612	0.076	0.2251	0.0059	0.08429	0.00087	0.0678	0.0086	1303	21	1308	31	1320	160	1295	20	88	36	0.409091	1308	31
M2_CVI1302_123	2.605	0.071	0.2237	0.0054	0.08476	0.00077	0.0642	0.008	1301	20	1301	28	1260	150	1307	17	191	85	0.445026	1301	28
M2_CVI1302_124	1.99	0.073	0.1785	0.0064	0.08123	0.00081	0.0531	0.0069	1110	25	1059	35	1040	130	1222	20	71	60	0.84507	1059	35
M2_CVI1302_125	1.696	0.055	0.1597	0.0049	0.07733	0.00045	0.0504	0.0052	1006	23	955	28	990	100	1129	12	652	187	0.28681	955	28
M2_CVI1302_126	1.478	0.048	0.1479	0.0045	0.07258	0.00077	0.0536	0.0065	920	19	889	25	1050	120	996	21	109	71	0.651376	889	25
M2_CVI1302_127	1.684	0.042	0.1685	0.004	0.07257	0.00057	0.0509	0.0061	1002	16	1004	22	1000	120	999	16	239	84	0.351464	1004	22
M2_CVI1302_128	2.203	0.057	0.2032	0.0047	0.07846	0.00093	0.0597	0.007	1180	19	1192	25	1170	130	1153	24	67	47	0.701493	1192	25
M2_CVI1302_129	2.896	0.075	0.2431	0.0056	0.08655	0.00088	0.0645	0.008	1379	20	1403	29	1260	150	1349	19	67	39	0.58209	1403	29
M2_CVI1302_130	1.965	0.049	0.1823	0.0044	0.07858	0.00046	0.0549	0.0068	1103	17	1079	24	1080	130	1160	12	397	154	0.387909	1079	24
M2_CVI1302_131	1.755	0.048	0.1628	0.0042	0.07812	0.00054	0.049	0.0058	1028	19	972	24	970	110	1147	14	323	162	0.501548	972	24
M2_CVI1302_132	2.687	0.067	0.2253	0.0053	0.08657	0.00064	0.0672	0.0079	1324	19	1310	28	1310	150	1349	15	171	72	0.421053	1310	28
M2_CVI1302_133	1.748	0.048	0.1752	0.0041	0.0724	0.001	0.0516	0.0063	1024	18	1041	23	1020	120	987	28	82	54	0.658537	1041	23
M2_CVI1302_134	1.314	0.047	0.1232	0.0041	0.07596	0.00069	0.043	0.0045	850	23	749	24	850	88	1090	19	214	57	0.266355	749	24
M2_CVI1302_135	1.745	0.046	0.1745	0.004	0.07268	0.00095	0.0504	0.0061	1024	18	1037	22	990	120	998	26	89	68	0.764045	1037	22
M2_CVI1302_136	1.598	0.043	0.1586	0.0037	0.07293	0.00091	0.0505	0.0063	968	17	949	21	990	120	1014	26	96	64	0.666667	949	21
M2_CVI1302_137	1.731	0.066	0.1695	0.0063	0.07414	0.00054	0.0526	0.007	1017	27	1008	36	1040	130	1046	14	279	50	0.179211	1008	36
M2_CVI1302_138	2.347	0.064	0.2095	0.0051	0.08122	0.00072	0.058	0.0069	1225	19	1226	27	1140	130	1223	17	138	146	1.05797	1226	27
M2_CVI1302_139	1.723	0.047	0.1705	0.004	0.07299	0.00094	0.0512	0.0062	1016	17	1015	22	1010	120	1010	27	88	69	0.784091	1015	22
